1 Antimicrobial resistance gene levels are independent of levofloxacin administration but related to  
2 abundance of specific pathobionts in dementia patients

3 Aislinn D. Rowan-Nash<sup>1</sup>, Rafael Araos<sup>2,3,4</sup>, Erika M.C. D'Agata<sup>5</sup>, & Peter Belenky<sup>1\*</sup>

4 <sup>1</sup> Department of Molecular Microbiology and Immunology, Brown University, Providence RI,  
5 USA

6 <sup>2</sup> Instituto de Ciencias e Innovación en Medicina (ICIM), Facultad de Medicina Clínica Alemana  
7 Universidad del Desarrollo, Chile

8 <sup>3</sup> Millenium Nucleus for Collaborative Research on Bacterial Resistance (MICROB-R), Chile

9 <sup>4</sup> Advanced Center for Chronic Diseases (ACCDiS), Facultad de Medicina Clínica Alemana  
10 Universidad del Desarrollo, Santiago Chile.

11 <sup>5</sup> Infectious Diseases Division, Rhode Island Hospital, Warren Alpert Medical School of Brown  
12 University, Providence, RI, USA

13

14 \* indicates corresponding author

15 PB: peter\_belenky@brown.edu

16 **ABSTRACT**

17 **Background:** The issue of antimicrobial resistance continues to grow worldwide, and long-term  
18 care facilities are significant reservoirs of antimicrobial-resistant organisms, in part due to high  
19 frequency of antimicrobial use. Patients with advanced dementia are particularly vulnerable to  
20 multidrug-resistant organism acquisition and antimicrobial overuse, which has negative  
21 consequences for the gut microbiome and can contribute to the selection and propagation of  
22 antimicrobial resistance genes. In this study, we examined the impacts of the fluoroquinolone  
23 antimicrobial levofloxacin on the gut microbiome of advanced dementia patients and the  
24 correlation between abundance of pathogens and antimicrobial resistance genes.

25 **Results:** We did not find significant impacts of levofloxacin on the diversity, composition,  
26 function, or resistome of the gut microbiota of this population. In fact, we observed significant  
27 inter- and intra-subject heterogeneity in the composition of the microbiota, suggesting temporal  
28 instability. However, we were able to link the antimicrobial resistance gene burden in a sample  
29 with the relative abundance of several pathobionts – particularly *Escherichia coli*, *Proteus*  
30 *mirabilis*, and *Enterococcus faecalis*, as well as less-prevalent species including *Providencia*  
31 *stuartii* and *Staphylococcus haemolyticus*. Furthermore, we used metagenomic assembly and  
32 binning to demonstrate that these species had higher genomic resistance gene levels than common  
33 gut commensals, and we were able to predict antimicrobial resistance gene burden from the relative  
34 abundances of these species in a separate, larger cohort from the same population.

35 **Conclusions:** We observe that levofloxacin did not have an impact on the microbiota, potentially  
36 due to high host absorption rate of this antimicrobial and high intra-subject temporal variability.  
37 However, we found that the relative abundances of several pathobionts were correlated with and  
38 were even predictive of the level of antimicrobial resistance genes in corresponding samples, and

39 that these species carried high levels of resistances genes in their assembled genomes. Given the  
40 high frequency with which these species were found at high levels in this population and the  
41 underlying vulnerability to infection with multidrug resistant organisms of advanced dementia  
42 patients, attention to microbial blooms of these species may be warranted.

43

44 Keywords: antimicrobial resistance, pathobiont, dementia, microbiome, metagenome assembly

45

46 **BACKGROUND:**

47           It is well-recognized that there is a growing threat of antimicrobial-resistant (AMR)  
48 bacterial strains that threaten the health and lives of millions worldwide. In the United States alone,  
49 the Centers for Disease Control and Prevention estimates that at least 2 million people get an AMR  
50 infection each year, and at least 23,000 die as a result[1]. A number of factors have driven the rise  
51 in AMR bacteria worldwide, including overprescription of antibiotics in the healthcare setting,  
52 over-the-counter access to antibiotics in some countries, and widespread use of antibiotics in  
53 animal husbandry for non-veterinary purposes[2-4]. Concerningly, hospitals and other medical  
54 institutions are frequent sites of AMR bacteria acquisition, where patients may already be ill or  
55 immunocompromised, antimicrobial use is common, and patient-to-patient transmission of AMR  
56 isolates can occur via inadequate hygiene or environmental contamination[5-8]. For example,  
57 AMR bacteria are highly prevalent in nursing homes, with estimates that over 35% of nursing  
58 home residents are colonized with multidrug resistant organisms (MDROs)[9-14]. This is  
59 particularly problematic in light of the fact that elderly patients in long-term care facilities may be  
60 frequently hospitalized, potentially serving as a mode of bidirectional transport of MDROs  
61 between healthcare facilities[15-17]. They are also prone to infections and are frequently treated  
62 with antimicrobials[18-20], which has long been associated with acquisition of MDROs and may  
63 not always be indicated[12, 17, 20-28].

64           The problem of MDRO prevalence and inappropriate antimicrobial use is of particular  
65 relevance in elderly subjects with advanced dementia, a population which receives extensive  
66 antimicrobial treatment which becomes more frequent closer to death, calling its benefit and  
67 effectiveness into question[28, 29]. Accordingly, advanced dementia specifically has been shown  
68 to be a risk factor of MDRO colonization[13, 30]. To examine this issue, the Study of Pathogen

69 Resistance and Exposure to Antimicrobials in Dementia (SPREAD) was undertaken from 2009-  
70 2012 in order to analyze MDRO acquisition and appropriateness of antimicrobial prescription in  
71 elderly adults with advanced dementia residing in nursing homes[31]. Supporting the widespread  
72 nature of MDRO carriage in this population, analysis of SPREAD subjects revealed that there were  
73 significant baseline levels and new acquisitions of MDROs, and that there was notable spread of  
74 MDRO strains within and even between nursing home facilities[28, 32].

75 In addition to potential facilitation of MDRO acquisition or spread, antimicrobial overuse  
76 may also have negative impacts on the diversity, composition, or function of the gut microbiota,  
77 which may already be vulnerable in elderly populations. Healthy younger adults tend to have a  
78 fecal microbiome characterized by relatively high diversity of species and populated primarily by  
79 members of the phyla *Bacteroidetes* and *Firmicutes*, largely obligate anaerobes which exist in  
80 homeostasis with the intestinal epithelium[33-37]. However, it has been found that during  
81 senescence, the gut tends to have higher levels of *Bacteroidetes* and *Proteobacteria* and harbors  
82 higher levels of facultative aerobes and potential pathobionts, including *Enterobacterales* such as  
83 *E. coli* [36, 38-45]. These changes become more pronounced as aging progresses, and several  
84 studies have indicated that age-related alterations to the gut microbiota are relatively minor in  
85 septuagenarians, but become more pronounced over time and are clear in centenarians and  
86 supercentenarians[39, 43, 46-48]. This is likely due to a number of factors, including the decline  
87 of immune function, onset of age-related diseases (including metabolic disorders), changes to diet  
88 and mobility, and the increased likelihood of medication utilization and/or hospitalization[42, 49].  
89 However, lifestyle of elderly adults has an important impact, as research suggests that community-  
90 resident elderly subjects have a distinct and more diverse microbiome compared with those of their  
91 hospitalized or institutionalized peers, which was suggested to be at least in part due to nutritional

92 differences[49, 50]. Furthermore, reduced microbiome diversity has been associated with  
93 increased frailty of elderly subjects[49, 51]. Accordingly, given that the microbiomes of  
94 institutionalized elderly patients are perhaps already at risk, understanding the impacts of  
95 antimicrobial use and MDRO acquisition on this population is of importance.

96         We analyzed the gut microbiomes of eleven subjects from SPREAD to examine the impact  
97 of antimicrobial use on the gut microbiota composition, function, and antimicrobial resistance gene  
98 (ARG) profile of elderly dementia patients. These subjects were chosen as they were the largest  
99 cohort who had received a single antimicrobial (levofloxacin) during the collection period, and we  
100 anticipated that this intervention could have an impact on the already-vulnerable microbiota of this  
101 elderly, institutionalized cohort. Levofloxacin is an antimicrobial of the fluoroquinolone class with  
102 high oral bioavailability[52-54] which has been found to reduce levels of Gram-negative aerobic  
103 bacteria – including *Proteobacteria* and particularly *Enterobacteriales* – in the fecal microbiota[55-  
104 61], although fluoroquinolone resistance among this taxon has been spreading[62-69]. A  
105 maximum of five rectal swab samples, collected every three months, were taken from each subject,  
106 and both 16S rRNA amplicon and shotgun metagenomics sequencing were performed. We  
107 analyzed alpha and beta diversity, taxonomic composition, functional potential, and antimicrobial  
108 resistance gene profiles before and after administration of levofloxacin. Interestingly, we did not  
109 find a specific impact of levofloxacin on any of these measures. However, we did find an  
110 association between blooms of particular enteric species and ARG burden, including in samples  
111 where MDRO were not detected by culture, suggesting that certain pathobionts carrying high ARG  
112 burdens may frequently colonize this population and that metagenomics may allow detection of  
113 resistant bacteria not flagged by culture-based methods.

114

## 115 **RESULTS**

### 116 ***Overview of Subjects***

117 Elderly patients in long-term care facilities, and particularly patients with advanced  
118 dementia, are frequently exposed to antimicrobials and are at high-risk of acquisition and carriage  
119 of MDRO[9-13, 18-20, 27-30, 32]. We were interested in whether levofloxacin, one of the most  
120 commonly prescribed antimicrobials, had impacts on the gut microbiota and resistome of these  
121 subjects. We analyzed up to five rectal swabs, taken every three months over the course of a year,  
122 from eleven subjects in the SPREAD cohort[31], using both 16S rRNA and shotgun metagenomics  
123 sequencing (Figure 1A). During their participation in the study, these subjects had received only  
124 levofloxacin (average course of eight days), which has previously been shown to decrease the  
125 proportion of the *Enterobacterales* order of *Proteobacteria*[55-61]. Of the eleven subjects, all but  
126 Subject I were female and all but Subject G were white. They ranged in age from 72 to 101, and  
127 six members of the cohort did not survive for the full year of the study (Additional Table 1). All  
128 but two subjects (C and G) resided in different nursing homes. Overall, there were 38 samples for  
129 metagenomics sequencing (Additional Table 2). Culture-based methods indicated that four of the  
130 eleven subjects acquired a MDRO during the study: Subject A acquired methicillin-resistant *S.*  
131 *aureus* (MRSA) at the 12-month timepoint, Subject B acquired multidrug-resistant *E. coli* at the  
132 3-month timepoint, and Subjects C and D both acquired multidrug-resistant *P. mirabilis* at the 3-  
133 month timepoint (Additional Table 1).

### 134 ***Alpha and Beta Diversity Metrics***

135 We first used the metagenomic sequencing data to compare the alpha diversity, or the  
136 diversity within each sample, of samples collected before and after levofloxacin administration.  
137 According to Shannon's Diversity Index, which incorporates both richness and evenness of

138 samples, there was no significant difference between the pre- and post-levofloxacin samples  
139 (Figure 1B). Furthermore, the alpha diversity was variable over time even within the same subject,  
140 and there was no clear trend of recovery in alpha diversity after antibiotic cessation. This suggests  
141 a degree of temporal instability, in which the richness and/or evenness of the samples varies  
142 changes over time.

143 We then examined beta diversity, or the diversity between samples. We utilized the Bray-  
144 Curtis Dissimilarity metric, which considers the identity and abundance of taxa shared between  
145 samples. Plotting this metric in a principal coordinate analysis (PCoA) revealed no apparent  
146 pattern of clustering based on either subject or sample collection point relative to levofloxacin, and  
147 in fact, samples from the same subject were often located quite distantly from one another (Figure  
148 1C). We then compared the within-subjects dissimilarity of sequential samples within a subject  
149 when both were pre-levofloxacin, both were post-levofloxacin, or one sample was pre- and one  
150 was post-levofloxacin; there was no significant difference between any of the groups (Figure 1D),  
151 suggesting that levofloxacin was not associated with community disruption. Furthermore, while  
152 within-subject dissimilarity was lower than between-subjects dissimilarity, the effect size was low  
153 (0.7013 vs. 0.7712, respectively; Figure 1E).

#### 154 ***Taxonomic Composition***

155 We utilized Kraken2 in conjunction the with Bayesian Reestimation of Abundance with  
156 KrakEN2 (Bracken2) pipeline to assign taxonomy to our metagenomic sequencing samples[70,  
157 71]. Corresponding to the high between-subjects beta-diversity, the taxonomic composition of the  
158 gut microbiome varied significantly between subjects. As is typical for the human gut microbiome,  
159 most bacteria belonged to the five major phyla of *Firmicutes*, *Bacteroidetes*, *Proteobacteria*,  
160 *Actinobacteria*, and *Verrucomicrobia*. However, consistent with the high within-subjects beta



161 diversity, the dominant phyla varied greatly even between samples from the same subject  
162 (Additional Figure 1); for example, the most abundant phylum in Subject E was *Bacteroidetes* at  
163 two timepoints, *Proteobacteria* at two timepoints, and *Firmicutes* at one (Additional Figure 1F).  
164 Overall, the most abundant phylum was *Actinobacteria* in three samples, *Bacteroidetes* in  
165 seventeen samples, *Firmicutes* in seven samples, and *Proteobacteria* in eleven samples  
166 (Additional Figure 1A-L); averaging across all samples, *Bacteroidetes* was highest at 34.2%,  
167 followed by *Proteobacteria* (26.9%), *Firmicutes* (23.3%), and *Actinobacteria* (11.2%) (Additional  
168 Figure 1A). Qualitatively, many of the samples from this population represent highly divergent  
169 and dysbiotic microbiomes compared with what is typically seen with younger subjects, in which  
170 *Proteobacteria* in particular make up a much smaller proportion of the microbiome than in these  
171 elderly dementia subjects[33].

172 The genus- and species-level taxonomic composition was also variable. Blooms of  
173 potential pathogens[72], including *Campylobacter ureolyticus*[73], *Corynebacterium*  
174 *urealyticum*[74], *Enterococcus faecalis*[75, 76], *Escherichia coli* [77, 78], *Oligella urethralis*[79-  
175 82], *Proteus mirabilis*[83, 84], *Providencia stuartii*[85, 86], *Pseudomonas aeruginosa*[87, 88],  
176 *Staphylococcus aureus*[89-91], and *Staphylococcus haemolyticus*[92-94], were fairly common,  
177 both before and after levofloxacin administration (Figure 2A, Additional Figure 2). Across  
178 subjects, even baseline samples varied in composition, as expected from beta-diversity analysis.  
179 Averaging across all samples, the single most-abundant species was *E. coli*, further supporting the  
180 qualitatively dysbiotic nature of the gut microbiome of this cohort (Figure 2A). Despite the high  
181 proportion of members of *Enterobacterales* in this cohort, Linear Discriminant Analysis Effect  
182 Size (LEfSe) analysis[95] did not reveal biomarkers for pre- or post-levofloxacin samples at the

183 phylum, genus, or species level. Full data on taxonomic composition at the phylum and species  
184 levels can be found in Additional Data 1.

185 As we had access to full 16S rRNA and shotgun metagenomics data for our samples, we  
186 compared their taxonomic identifications at the genus level. The two methods of analysis were  
187 generally consistent, and blooms of prominent genera (including *Escherichia*, *Proteus*,  
188 *Enterococcus*, *Providencia*, *Staphylococcus*, and *Bacteroides*) were generally detected by both  
189 analysis pipelines (Additional Figure 3A). Metagenomics analysis was unsurprisingly able to  
190 detect more distinct genera, and of the genera that were called by both pipelines, LEfSe analysis  
191 revealed biases in both methods. For example, metagenomics analysis by Kraken2 and Bracken2  
192 detected higher levels of *Bacteroides*, while 16S rRNA analysis with Quantitative Insights Into  
193 Microbial Ecology 2 (QIIME2)[96] detected higher levels of *Ruminiclostridium*. Full data on  
194 taxonomic abundances at the genus level can be found in Additional Data 1 for metagenomics and  
195 Additional Data 2 for 16S rRNA.

### 196 ***Functional Potential***

197 We used the Human Microbiome Project Unified Metabolic Analysis Network 2  
198 (HUMAN2) pipeline[97] to analyze the genetic content of the metagenomic samples. We utilized  
199 LEfSe to compare community function at the Kyoto Encyclopedia of Genes and Genomes (KEGG)  
200 ortholog, Gene Ontology (GO) term, and MetaCyc pathway levels. As in the taxonomic analysis,  
201 there were no significant biomarkers of either pre-or post-levofloxacin administration samples.  
202 However, while the taxonomic profile of the samples varied greatly, the functional capacity of the  
203 samples was fairly consistent across samples (Additional Figure 4). Full data on functional  
204 potential can be found in Additional Data 3.

### 205 ***Antimicrobial Resistance Gene Profile***

206 We used the DeepARG machine-learning program[98] to detect resistance genes in the  
207 metagenomic samples. Across all samples, the most abundant class of ARG was “multidrug”,  
208 followed by “macrolide-lincosamide-streptogramin” (MLS), and “tetracycline”. The most  
209 common specific gene detected was the multidrug resistance *rpoB2* variant of the RNA polymerase  
210 beta subunit, followed by the MLS resistance gene *macB* and a multidrug ABC transporter (Figure  
211 2B). LEfSe analysis revealed no ARG biomarkers of either pre- or post-levofloxacin samples. Full  
212 data on ARG composition can be found in Additional Data 4.

213 However, we were able to detect changes in specific ARG classes and genes that  
214 corresponded with the detection of antimicrobial-resistant organisms in two subjects. Subject A  
215 acquired MRSA at the 12-month timepoint, and a bloom of this species to 25.0% could be detected  
216 in the metagenomic taxonomic data (Figure 3A, Additional Figure 2B). While the overall level of  
217 ARGs did not notably increase at this timepoint, there was a clear expansion in beta-lactam  
218 resistance genes (Figures 3B, Additional Figure 5B), including the *mecA/mecRI/mecI* operon,  
219 which regulates expression of the low-affinity penicillin-binding protein *mecA* (PBP-2A)[99-102]  
220 (Figure 3C). This operon is characteristic of MRSA strains[99-102], supporting the culture-based  
221 classification of this *S. aureus* isolate as MRSA.

222 Similarly, Subject B acquired multidrug-resistant *E. coli* (resistant to the beta-lactams  
223 ampicillin/sulbactam, cefazolin, ceftazidime, and ceftriaxone and to the fluoroquinolone  
224 ciprofloxacin) at the three-month timepoint, and the proportion of this species expanded to 47.3%  
225 of the population in the corresponding sample (Figure 3D, Additional Figure 2C). Accordingly,  
226 this sample showed a notable increase in the relative abundance of ARGs, which was in large part  
227 driven by an increase in a number of multidrug resistance genes (Figure 3E); there was also a clear  
228 increase in several beta-lactam resistance genes, including the low-affinity penicillin-binding

229 protein genes *PBP-1A*, *PBP-1B*, and *penA* (*PBP2*) as well as class C beta-lactamase genes[103-  
230 108], and several fluoroquinolone resistance genes, including the transporters *patA* and *mdtK* [109-  
231 113] (Figure 3F-G).

232 Despite the acquisition of multidrug-resistant *P. mirabilis* at the three-month timepoint in  
233 Subjects C and D, there was no corresponding increase in ARGs. ARG levels stayed approximately  
234 the same in Subject C (0.372% at baseline and 0.384% at three months) and decreased in Subject  
235 D from 0.482% at baseline to 0.364% at the three-month timepoint (Figures 2B, Additional Figure  
236 5D-E). However, this corresponds to the taxonomic data; levels of *P. mirabilis* were low and stable  
237 in Subject C (0.55% at baseline and 0.61% three months later), and while *P. mirabilis* made up  
238 13.8% of the population at baseline in Subject D, it underwent a reduction to 2.3% at the three-  
239 month timepoint (Figures 2A, Additional Figure 2D-E). Taken together, this data indicates that  
240 our metagenomics pipeline can detect blooms of AMR pathogens and that the corresponding  
241 change in ARG levels aligns with culture-based detection of MDROs. At the same time,  
242 metagenomic analysis of some samples found blooms of pathogens and ARGs that were not  
243 associated with culture-based MDRO detection.

#### 244 ***Attribution of ARG Density to Specific Species***

245 While total ARG density within samples did not vary by levofloxacin administration, there  
246 was significant variability between samples. In fact, most samples had similar baseline levels of  
247 ARGs of 0.3% to 0.4% of the total reads, while only a few samples rose above this value to between  
248 0.6% and 0.8%. Close inspection of the taxonomic composition of the samples revealed that  
249 samples with higher levels of ARGs tended to have blooms of one or more of the *Proteobacteria*  
250 species *E. coli* and *P. mirabilis* and the *Firmicutes* species *E. faecalis*, strains of which are common  
251 pathobionts[114-120] (Figure 4A). Confirming this association, correlation analysis between ARG

252 levels and the sum of the relative abundances of these three species showed a strong and significant  
253 positive correlation ( $r = 0.791$ ,  $R^2 = 0.6254$ ,  $p < 0.0001$ , Pearson's correlation; Figure 4B). This  
254 suggests that in samples with higher-than-baseline ARG levels, ARG abundance is being driven  
255 by high relative abundance of these three species.

256         However, there were two notable exceptions: Samples E9 and H6 had high levels of ARGs  
257 without corresponding blooms of these three species. However, *P. stuartii* bloomed to 41.9%  
258 relative abundance in Sample E9 and *S. haemolyticus* bloomed to 36.9% in Sample H6 (Figure  
259 2A, Additional Figure 2F&I). Both species have long been associated with AMR phenotypes[93,  
260 94, 121-127] and were not found at high levels in other samples, but could explain the higher ARG  
261 abundance in these samples (Figure 4A). Supporting this possibility, an examination of the ARGs  
262 in Sample H6 showed a distinct profile relative to other samples, with high levels of staphylococcal  
263 resistance genes including fluoroquinolone resistance gene *norB* and macrolide-streptogramin  
264 resistance gene *msrA* [128-131](Figures 2B, 3I-L). Accordingly, addition of *P. stuartii* and *S.*  
265 *haemolyticus* abundances to the analysis resulted in a stronger correlation ( $r = 0.933$ ,  $R^2 = 0.8706$ ,  
266  $p < 0.0001$ , Pearson's correlation; Figure 4C).

267         To more rigorously examine the relationship between the species of interest and ARG  
268 levels, we performed metagenomic assembly and binning to compare the levels of ARGs in these  
269 organisms to levels in other common and abundant species, including likely commensals and  
270 potential pathogens (Figure 4D). Specifically, we analyzed bins that passed various quality  
271 controls (Additional Table 3) and corresponded to species identified by Kraken2/Bracken2 to  
272 make up greater than 0.1% of their source samples (Additional Table 4).

273         As anticipated, we found that the levels of ARGs in bins from *E. coli* and *P. mirabilis* were  
274 consistently high compared to other species analyzed. In fact, *E. coli* had the highest average ARG

275 density of any species analyzed, while *P. mirabilis* was the fifth-highest. Notably, the ARG  
276 composition of the bins of these species from samples in which MDROs were detected (B3, C3,  
277 and D3) did not appear to be different from those of other samples (Additional Figure 6A-B),  
278 although it is possible that some resistance genes were carried on plasmids that were not assembled  
279 into genomes. *P. stuartii* had the second-highest average ARG density, reflecting the expansion of  
280 ARGs detected in sample E9, where this species bloomed to 41.9% of the population. The third  
281 and fourth positions were taken by the single bins constructed for *Klebsiella oxytoca* and  
282 *Morganella morganii*, other *Proteobacteria* with pathogenic potential[132-134]. *P. aeruginosa*  
283 bins rounded out the top six, with similar levels to the other top species. However, as *K. oxytoca*  
284 and *M. morganii* were never present at greater than 3% and *P. aeruginosa* bloomed in only two  
285 samples, they did not significantly contribute to overall ARG density in the cohort. Importantly,  
286 high ARG density was not a universal feature of *Proteobacteria*, or even of pathogenic  
287 *Proteobacteria*; bins constructed for the *Campylobacter* species *C. hominis* and *C. ureolyticus* had  
288 universally low ARG levels. Additionally, while we could not construct a high-quality bin for *O.*  
289 *urethralis*, the low ARG densities in the samples in which this species bloomed (C0 and C3)  
290 suggests that it also has low genomic ARG content. This suggests that high ARG density among  
291 the *Proteobacteria* analyzed was restricted to the *Gammaproteobacteria* class, primarily of the  
292 order *Enterobacterales* but also including *Pseudomonadales*.

293 We were only able to construct two good-quality bins for *E. faecalis*, which varied in their  
294 ARG levels, particularly on the basis of bacitracin resistance. On average, while the two bins did  
295 not have ARG levels as high as the *Proteobacteria* of interest, they did rank among the highest of  
296 the *Firmicutes* bins tested. We were also able to create a single bin for *S. haemolyticus* from  
297 Sample H6 in which it made up 36.9% of the population. This bin had an ARG density higher than

298 the average for any other non-*Proteobacteria* species, supporting its role in the high ARG levels  
299 found in the corresponding sample. As expected from the analysis of the total ARG population of  
300 that sample (Figure 3G), the staphylococcal resistance genes *norB* and *msrA* were found in this  
301 bin. We were also able to create two bins for *S. aureus*, including from sample A12 where MRSA  
302 was detected. The A12 bin contained the characteristic MRSA gene *mecA* while the H6 bin did  
303 not, suggesting that the *S. aureus* strain found in H6 was not MRSA (Figure S6C). In general, bins  
304 from the phyla *Actinobacteria* (including *Bifidobacterium* and *Corynebacterium* species) and  
305 *Bacteroidetes* (including *Bacteroides* and *Parabacteroides* species) had low ARG levels. Full data  
306 on the ARGs and classes found in species-level bins can be found in Additional Data 4.

### 307 ***Prediction of ARG Density from Species Abundances***

308 Our initial analysis only considered the eleven subjects for whom we had longitudinal  
309 metagenomics data due to their receiving levofloxacin. We also had access to a larger dataset:  
310 shotgun metagenomics had been performed on a further 67 samples for a related study. In this  
311 case, the data was not longitudinal and encompassed an array of antibiotic treatment conditions  
312 across 67 subjects, providing a diverse set of taxonomic and ARG data on which to test whether  
313 the relationship between *E. coli*, *P. mirabilis*, and *E. faecalis* and ARG density held true. As an  
314 initial test, we performed the same correlation analyses between species of interest and ARG levels  
315 as on the levofloxacin dataset, finding that both the simple and complex models showed significant  
316 correlation ( $r = 0.7179$ ,  $r^2 = 0.5154$ ,  $p < 0.0001$  and  $r = 0.7627$ ,  $r^2 = 0.5817$ ,  $p < 0.0001$ , respectively;  
317 Pearson's correlation; Figure 5A-B). This provided initial support for the trend being present in  
318 the wider dataset.

319 We then created a multiple linear regression model to predict ARG density using the  
320 relative abundances (RA) of the three main species of interest in the initial levofloxacin dataset,

321 with the following equation: (ARG density) = 0.003482 + 0.006221(*E. coli* RA) + 0.006248(*P.*  
322 *mirabilis* RA) + 0.006920(*E. faecalis* RA) (Figure 5B). We then used this equation to predict the  
323 ARG density in the larger metagenomics dataset and found that it was able to accurately predict  
324 the true ARG level of those samples, with predicted and actual values correlating significantly ( $r$   
325 = 0.7139,  $r^2 = 0.5096$ ,  $p < 0.0001$ ; Pearson's correlation; Figure 5C). As before, there were a few  
326 notable outliers with higher ARG levels than predicted by the model; those three samples  
327 contained high levels of *P. stuartii*, *P. aeruginosa*, or *Klebsiella pneumoniae*. This maps well to  
328 the fact that we observed high levels of ARGs in bins constructed from *P. stuartii*, *P. aeruginosa*,  
329 and the related species *K. oxytoca* (Figure 4D).

330 We also created a multiple linear regression model that incorporated the relative  
331 abundances of *P. stuartii* and *S. haemolyticus*, which caused outliers from the original species-  
332 ARG correlation: (ARG density) = 0.003253 + 0.006715(*E. coli* RA) + 0.006748(*P. mirabilis* RA)  
333 + 0.003461(*E. faecalis* RA) + 0.01123(*S. haemolyticus* RA) + 0.007569(*P. stuartii* RA) (Figure  
334 5E). As before, we tested this equation against the larger dataset, and found that it slightly  
335 increased the accuracy of the predictions; specifically, it eliminated the outlier which had high *P.*  
336 *stuartii* levels and slightly improved the correlation between predicted and actual ARG levels ( $r =$   
337 0.7753,  $r^2 = 0.6012$ ,  $p < 0.0001$ ; Pearson's correlation; Figure 5F). However, the simpler model is  
338 more broadly applicable, as blooms of *P. stuartii* and *S. haemolyticus* are relatively uncommon.  
339 Similarly, while *Klebsiella* spp. and *P. aeruginosa* may also contribute to high ARG density in  
340 samples, they do not bloom as commonly in this cohort as the core predictive species of *E. coli*, *P.*  
341 *mirabilis*, and *E. faecalis*.

342 These results indicate that in this population, levels of only a few key species could predict  
343 the majority of ARG abundance beyond background levels. Both the core predictive species (*E.*



344 *coli*, *P. mirabilis*, *E. faecalis*) and others that are associated with high ARG levels in samples (*P.*  
345 *stuartii*, *S. haemolyticus*, *P. aeruginosa*, *Klebsiella* spp.) are pathogens and/or pathobionts.  
346 Monitoring levels of these species may be helpful in elderly, institutionalized populations, as these  
347 patients may be vulnerable to developing or transmitting AMR infections from high-level carriage  
348 of these species.

349

## 350 **DISCUSSION**

351 Overall, we found that the microbial composition of the gut microbiome of elderly patients  
352 with advanced dementia was quite variable, both between subjects and over time within the same  
353 subject. Even in the absence of antimicrobial treatment, there was notable fluctuation in the  
354 abundance of a number of species, including pathobionts such as *E. coli*, *P. mirabilis*, and *E.*  
355 *faecalis*. When comparing the taxonomic composition, functional potential, and resistome of pre-  
356 and post-levofloxacin samples, we did not find any significant differences. One potential reason  
357 for this finding is that oral levofloxacin is well-absorbed by the host, with greater than 99%  
358 bioavailability[52, 53, 135-137], and therefore may not be directly available to the luminal  
359 microbiota of the lower gastrointestinal tract at high levels. Furthermore, other studies have  
360 suggested that levofloxacin has a relatively minor impact on the gut microbiome, primarily  
361 reducing levels of *Enterobacterales*[55-61], and it may be less-associated with *Clostridiodes*  
362 *difficile*-associated diarrhea outbreaks than other antimicrobials, including other  
363 fluoroquinolones[138].

364 Additionally, in this cohort, levofloxacin was typically administered at least two weeks  
365 prior to collected timepoints, potentially allowing sufficient time for the microbiome to recover  
366 from or shift away from its immediately post-antibiotic state. Furthermore, the impacts of

367 levofloxacin on the gut microbiome may be dependent upon the initial state upon administration.  
368 If the microbiome is initially relatively diverse and healthy, antibiotic administration may be  
369 disruptive and allow blooms of atypical dominant species such as members of *Proteobacteria*;  
370 such an occurrence might be observed in Subject F, where a diverse *Bacteroides*-dominated  
371 microbiome was overtaken by several *Enterobacterales* after levofloxacin treatment (Additional  
372 Figure 2G). Alternatively, if the microbiome is initially dominated by one or more pathogens,  
373 antimicrobial administration may correct such blooms and allow for the restoration of a diverse  
374 community, as might have occurred in Subject E as a *P. stuartii* bloom was eliminated (Additional  
375 Figure 2F).

376 Finally, since the pre-existing temporal instability of this community was high,  
377 levofloxacin-related changes may not be detectable through the noise of this cohort's general  
378 microbiome instability. In contrast to our observations, studies in adults have generally found that  
379 the within-subjects dissimilarity is much lower than between-subjects dissimilarity, in line with  
380 the fact that the gut microbiome tends to be relatively stable within the same subject over time –  
381 including in an elderly cohort[33, 34, 41, 139, 140]. This suggests that the gut microbiomes of the  
382 subjects in this study were less stable than that of other cohorts, potentially suggesting that this  
383 institutionalized population with advanced functional impairment is more prone to infections or  
384 has weaker immune systems than young healthy adults or even community-resident elderly adults.  
385 Interestingly, despite the taxonomic variability, the functional composition of the cohort was  
386 relatively similar across samples and subjects. This is in line with previous studies of the human  
387 gut microbiome, which suggest that variable taxa can fill the same functional niches, resulting in  
388 a more similar functional composition across individuals despite inter-individual differences in the  
389 taxonomic composition[33, 35, 141].

390 As all of the subjects had been given an antibiotic, we were particularly interested in the  
391 antibiotic resistance profile of the subjects before and after levofloxacin administration. However,  
392 as observed in the taxonomic and functional data, there was no apparent association of any ARG  
393 genes or classes with either pre- or post-levofloxacin status. This may be due to the fact that  
394 levofloxacin did not have any specific impacts on the resistome of this cohort, or due to the factors  
395 that may have concealed any impacts of levofloxacin, as discussed above. However, we were  
396 particularly intrigued by the finding that ARG density in a particular sample could be linked to the  
397 abundance of a few key species. *E. coli*, *P. mirabilis*, and *E. faecalis* are all pathobionts that are  
398 often found at low levels in a healthy microbiome, but bloomed frequently at various timepoints  
399 across a majority of our subjects. All three species can cause severe illness, have been previously  
400 observed to colonize nursing home residents, and include well-known multidrug-resistant  
401 strains[11-13, 28, 30, 32, 68, 75, 114-120, 142]. In fact, three of the subjects (B, C, and D) are  
402 known to have acquired multidrug-resistant strains of *E. coli* and *P. mirabilis* during the study.  
403 However, we observed an association between these three species and ARG levels across the entire  
404 sample set (Figure 4B), and the ARG composition of the bins of *E. coli* and *P. mirabilis* from  
405 samples where MDROs were detected were not distinct from their other bins (Additional Figure  
406 6A-B). This suggests that metagenomic sequencing may allow the identification of antimicrobial-  
407 resistant organisms that escape detection via culture-based techniques, although it is also possible  
408 that the multidrug-resistant isolates contained ARG-carrying plasmids that were not captured by  
409 our assembly and binning strategy.

410 A major implication of this finding is that metagenomic analysis could be a particularly  
411 useful tool to track antimicrobial resistance in institutions like nursing homes and hospitals,  
412 particularly with the capability to construct contigs and bins that allow examination of specific

413 genomes. In this case, it has allowed us to connect the high levels of ARGs in certain samples with  
414 correspondingly high levels of specific pathobionts, which had high proportions of ARGs within  
415 their genomes even in samples where MDROs were not detected. In a vulnerable population  
416 already prone to infections and carriage of MDROs, metagenomics could be a useful surveillance  
417 tool to assess the prevalence or transmission of ARGs in long-term care facilities.

418         Importantly, all of the subjects in our study were institutionalized in nursing homes, and  
419 there exists significant potential for transfer of bacteria between patients. As all but two of our  
420 subjects (C and G) lived in different homes, we could not directly examine this possibility  
421 ourselves, but it is possible that the high abundance of pathobionts and/or ARGs in our cohort is  
422 related to the spread of isolates within nursing homes. This also raises the possibility that we would  
423 not find a similar association between pathobionts and ARG levels in a healthy or community-  
424 based elderly cohort, who might be less likely to harbor or transmit such high levels of these  
425 bacteria. However, if an association between particular “sentinel” species and ARGs holds true in  
426 other elderly institutionalized populations, qPCR detection of the loads of these such pathobionts  
427 may allow for prediction of resistant bacterial outbreaks before they occur.

428         In addition to the increased potential for spread of resistant strains through institutions,  
429 there are some other potential explanations for the association between ARGs and these particular  
430 species. In particular, all of the species that we found to be associated with ARG density are  
431 potential human pathogens, can be grown *in vitro*, and have been previously associated with AMR  
432 phenotypes. ARGs, as well as mobile genetic elements carrying them, from these species may be  
433 better-studied than those from organisms less likely to pose a threat to human health, including gut  
434 commensals. If ARGs from these organisms are well-represented in databases, it could potentially  
435 bias analyses based on these databases toward detecting pathogen- over commensal-associated

436 ARGs. However, there has been significant work done on the resistome of the human commensal  
437 microbiome, including functional metagenomics to detect new ARGs. These have found that  
438 commensal anaerobes may serve as significant reservoirs of ARGs, and may in some cases  
439 contribute to the transfer of resistance to pathobionts[143-150]. Commensal carriage of  
440 antimicrobial resistance genes may correspond to the baseline level of 0.3-0.4% ARGs observed  
441 in samples without pathobiont dominance.

442         Some limitations to the findings of this study must be acknowledged. First, as for all  
443 database-based methodologies, we are limited by accuracy and completeness of those databases.  
444 While the human gut microbiome is fairly well-characterized, there may be so-called microbial  
445 dark matter that is not well-represented in the taxonomic database used for species identification.  
446 We also used a database composed of bacterial and archaeal genomes, excluding consideration of  
447 bacteriophage and microbial eukaryotes from our analyses. As mentioned, database representation  
448 is particularly relevant for our ARG analysis, as the genes in this database may be skewed towards  
449 easily-culturable and pathogenic source species, and our analysis may have missed ARGs found  
450 in commensal or unculturable gut species. Additionally, critics have noted that some genes found  
451 in ARG databases used have unclear links to resistance phenotypes, and may perform regulatory,  
452 efflux, or other functions not always related to antimicrobial resistance[143, 151].

453         Second, we were limited by the original SPREAD population, in which few subjects  
454 received only a single antimicrobial during the course of the study; this makes it difficult to say  
455 whether the temporal variability we observed was widespread in the cohort, although the fact that  
456 there were frequently high pathobiont levels observed in the larger metagenomics dataset we used  
457 to test our multiple linear regression suggests that this may be the case. Third, in this study we  
458 worked with rectal swabs, which are similar but not identical to fecal samples and may be

459 susceptible to cross-contamination from urinary pathogens or skin flora, particularly in incontinent  
460 advanced dementia patients[152-155]. Fourth, metagenomic assembly has limitations. It cannot  
461 create bins of all species found in a given sample, genome reconstruction is based on the isolates  
462 present in the database used, and analysis of assembled genomes may exclude consideration of  
463 plasmids – which are often sources of ARGs. Finally, as we analyzed metagenomic data, we cannot  
464 comment on the actual antimicrobial resistance phenotypes of the communities or individual  
465 bacteria that we studied.

466

#### 467 **CONCLUSIONS:**

468         The gut microbiome was highly variable both between and within subjects, with frequent  
469 blooms and reductions of bacterial species both before and after levofloxacin treatment. We did  
470 not find that levofloxacin had a consistent impact on specific taxa or functions, levels of  
471 antimicrobial resistance genes, or overall microbiome diversity in these subjects. This may suggest  
472 that administration of levofloxacin to this population does not have a detectable impact on their  
473 microbiomes. However, while we could not link levofloxacin to antimicrobial resistance gene  
474 levels, there were a number of samples that had higher relative abundances of these genes. In our  
475 original metagenomics dataset, we were able to identify that levels of these genes could be linked  
476 to blooms of specific bacterial species, including *E. coli*, *P. mirabilis*, and *E. faecalis*. We were  
477 able to build a model to predict total ARG levels in a sample from the relative abundance of these  
478 species, and confirm the validity of this model in a larger metagenomics dataset from the rest of  
479 the SPREAD study, including subjects taking a range of antibiotics. Furthermore, use of  
480 metagenomic assembly and binning allowed us to confirm that our species of interest carry greater

481 ARG densities than other abundant members of the microbiome, even in subjects where MDROs  
482 were not detected by culturing.

483 This demonstrates that there is a significant amount of information that can be obtained  
484 from metagenomic assembly and binning. With sufficient depth, powerful computational tools  
485 allow whole genomes to be assembled from short-read metagenomic sequencing, which permits  
486 interrogation of the likely features of species of interest in complex microbial communities. In our  
487 case, we were able to confirm the association between pathobiont blooms and ARG levels in the  
488 gut, showing that the genomes of pathobionts contained a greater proportion of ARGs than gut  
489 commensals such as *Bacteroides* and *Bifidobacterium* species. This suggests that while the  
490 commensal microbiota are known to serve as reservoirs of antimicrobial resistance, in this cohort  
491 blooms of pathobionts may serve as the driver of ARG levels in the gut microbiome. Given how  
492 frequently these blooms occurred, special attention should be paid to these species in dementia  
493 patients in long-term care facilities, a vulnerable group which is often immunocompromised,  
494 frequently administered medication including antimicrobials, and may carry MDRO at relatively  
495 high levels.

## 496 **METHODS**

### 497 ***Sample Collection and Preparation***

#### 498 Subjects:

499 Eleven subjects were chosen from the SPREAD cohort based on the following inclusion  
500 criteria: at least two consecutive rectal swabs were collected from the subject during the study,  
501 subjects had received a single oral course of levofloxacin during the study (average course of 8  
502 days), and subjects received no other antimicrobials during the study or in the 3 months prior to  
503 the first sample collection. Of the 11 subjects, 10 were female and 10 were white, while ages

504 ranged from 72 to 101. Five subjects lived through the entire sample collection period, while the  
505 other six passed away at some point prior to the final collection; between this attrition, one sample  
506 that was not collected, and three samples that were not well-sequenced, we had a total of 38 usable  
507 metagenomic samples (Figure 1A; Additional Tables S1-2). All samples were collected under  
508 SPREAD, which was approved by the Institutional Review Board at Hebrew Life[31].

#### 509 Sample Collection:

510 Samples were collected by insertion of sterile double-tipped swabs (Starswab II; Starplex  
511 Scientific Inc., Ontario, Canada) into the anus of the subject. The first swab was used to identify  
512 multidrug-resistant organisms (including methicillin-resistant *S. aureus*, vancomycin-resistant  
513 enterococci, and multidrug-resistant Gram-negative organisms such as *E. coli*, *P. mirabilis*, *P.*  
514 *aeruginosa*, or *P. stuartii*) via culturing techniques as described previously[156]. The second swab  
515 was frozen in 20% glycerol at -80°C for DNA extraction and sequencing.

#### 516 Sample Processing:

517 Frozen rectal swabs were thawed and placed into 96-well plates, before extraction using  
518 the PowerSoil DNA Isolation Kit (MOBIO, West Carlsbad, CA) according to the manufacturer's  
519 instructions. DNA concentrations were measured using a Nanodrop 1000 (Thermo Scientific,  
520 Waltham, MA) and extracted DNA was stored at -20°C until further use.

#### 521 ***16S rRNA Amplicon Sequencing***

#### 522 Sequencing:

523 The V4 hypervariable region of the 16S rRNA gene was amplified according to Earth  
524 Microbiome Project protocols. Amplification was performed using Illumina-adapted universal 16S  
525 primers 515F and 806R under the following conditions: 3 minutes at 94°C, 45 cycles of [45  
526 seconds at 94°C, 60 seconds at 50°C, 90 seconds at 72°C], 10 minutes at 72°C. All reactions were



527 prepared using 5 PRIME polymerase 1X HotMasterMix (5PRIME, Gaithersburg, MD) and run in  
528 triplicate to alleviate primer bias. Triplicates were pooled before cleaning with a PCR Purification  
529 Kit (Qiagen). These products were quantified using the Qubit dsDNA High Sensitivity Assay Kit  
530 (Invitrogen, Eugene, OR) and samples were pooled in equimolar amounts. Sequencing was  
531 performed using the Illumina MiSeq platform located at the New York University Langone  
532 Medical Center Genome Technology Core. Sequences can be found under the BioProject  
533 accession number PRJNA573963 (<http://www.ncbi.nlm.nih.gov/bioproject/573963>).

#### 534 Data Processing:

535 Data processing was performed using the QIIME2 (v 2019.1) pipeline[96]. The Divisive  
536 Amplicon Denoising Algorithm 2 (DADA2) method was used to quality-filter sequences and  
537 categorize amplicon sequence variants (ASVs)[157], and the SILVA (release 132) 99% identity  
538 V4 classifier was used to assign taxonomy to ASVs[158]. See Additional File 1 for more  
539 information. Taxonomic relative abundances were exported at the genus level for further analysis.  
540 Output data can be found in Additional Data 2.

541

#### 542 ***Shotgun Sequencing***

##### 543 Sample Preparation and Sequencing:

544 Extracted DNA (2 ng DNA in 50 uL buffer) was sheared to 450bp using a Covaris LE220  
545 system. Library preparation was performed using a Biomek FXP Automated Liquid Handling  
546 Workstation (Beckman Coulter) with the KAPA HyperPrep Kit (Roche), with 12 cycles of PCR.  
547 Final libraries were normalized and pooled, with 20 samples per pool. Each pool was run on 2  
548 lanes of an Illumina HiSeq 4000 using the paired-end 2x150bp protocol. Library preparation and  
549 sequencing was performed at the New York University Langone Medical Center Genome

550 Technology Core. Sequences can be found under the BioProject accession number PRJNA573963  
551 (<http://www.ncbi.nlm.nih.gov/bioproject/573963>) for the levofloxacin dataset and under the  
552 BioProject accession number PRJNA531921 (<https://www.ncbi.nlm.nih.gov/bioproject/531921>)  
553 for the test dataset.

#### 554 Data Processing:

555 Raw shotgun sequencing reads were processed using Kneaddata (v0.6.1) to remove  
556 contaminating human sequences from the dataset[159]. Briefly, the *kneaddata* function was used  
557 with the Bowtie2 *Homo sapiens* database (v0.1)[160] to remove contaminating host reads from  
558 the sequencing files. See Additional File 1 for more information.

#### 559 Taxonomic Classification:

560 Kraken2, a taxonomic classifier that maps shotgun sequencing k-mers to genomic  
561 databases, was used to assign taxonomy to kneaddata-processed shotgun sequencing reads[70].  
562 Briefly, the *kraken2-build* function was used to create a custom database containing the “bacteria”  
563 and “archaea” from NCBI libraries, and the *kraken2* function was used to run the kneaddata-  
564 filtered shotgun sequencing reads against this database and assign taxonomy. While Kraken2 does  
565 not estimate species abundances, Bracken2 (Bayesian Reestimation of Abundance with KrakEN)  
566 uses the taxonomy assigned by Kraken2 to estimate the number of reads per sample that originate  
567 from individual species[71]. The Kraken2 database was used to create a Bracken-compatible  
568 database using the *bracken-build* function, and the Kraken2 report files for each sample were run  
569 against the Bracken database using the *bracken* function for the phylum, genus, and species levels.  
570 Phylum- and species-level relative abundance outputs were formatted for biomarker discovery  
571 using LEfSe. The *kraken-biom* function was used to convert the Bracken report files into a biom

572 file for import into R. Output data can be found in Additional Data 1. Relative abundance plots  
573 were generated in GraphPad Prism v8.

#### 574 Taxonomic Diversity Analysis:

575 Alpha and beta diversity analyses were performed using the phyloseq (v1.27.2)[161, 162]  
576 and vegan (v2.5-4)[163] packages in R (v3.4.3). Briefly, the biom file was imported into a  
577 phyloseq object. The phyloseq *estimate\_richness* function was used to obtain Shannon's Diversity  
578 Index values for all samples, while the vegan *phyloseq::distance* and *ordinate* functions were used  
579 to generate a Bray-Curtis matrix and PCoA values. See Additional File 1 for more information.  
580 Data was exported as csv files for formatting, and plotting was performed in GraphPad Prism v8.

#### 581 Gene and Pathways Analysis:

582 The Human Microbiome Project Unified Metabolic Analysis Network 2 (HUMAN2)  
583 pipeline was used to profile the presence and abundance of genetic pathways in our samples[97].  
584 Briefly, the *humann2* function was used with the kneaddata-filtered metagenomic sequences to  
585 estimate genes and MetaCyc pathways present in the samples based on the UniRef90 database,  
586 files were joined using the *humann2\_join\_tables* function and the full tables were de-leveled using  
587 the *humann2\_split\_stratified\_table* function. The unstratified gene-level abundances were  
588 converted to both GO terms and KEGG orthologs using the *humann2\_regroup\_table* function, and  
589 the *humann2\_renorm\_table* function was used to normalize the MetaCyc pathway, GO term, and  
590 KEGG ortholog tables by computing relative abundance. These relative abundance tables were  
591 formatted for biomarker discovery with LEfSe. Additionally, the, and LEfSe was also used to  
592 analyze pre- and post-treated samples using both outputs. See Additional File 1 for more  
593 information. Output data can be found in Additional Data 3. Plots were generated in Graphpad  
594 Prism 8.

595 Resistome Analysis:

596           The ARG content of the samples was analyzed using DeepARG-SS, a deep learning model  
597 that can predict ARGs from short-read metagenomic data[98]. We first analyzed the data using the  
598 *deeparg* function with the *-reads* flag. The mapped ARGs output was then imported into R, where  
599 it was processed to obtain tables of the ARGs detected per sample at both the specific gene and  
600 antibiotic class levels. The ARGs detected were normalized to the number of reads per sample.

601           Additionally, after metagenomic assembly and binning was performed (see below),  
602 individual bins were analyzed using DeepARG-LS, a deep learning model optimized to predict  
603 ARGs from gene-level input. The *DNA\_features* output from selected bins was analyzed using the  
604 *deeparg* function with the *-genes* flag to analyze whether the levels or identity of ARGs could be  
605 linked to specific species of interest. The ARGs detected were normalized to the number of features  
606 per bin. All output data can be found in Additional Data 4. Plots were generated in GraphPad Prism  
607 8.

608 Metagenomic Assembly and Binning:

609           To further examine the ARGs present in the samples, kneaddata-filtered reads were  
610 uploaded to the web-based Pathosystems Resource Integration Center (PATRIC)[164]. Reads  
611 were assembled into contigs using the *auto* option of the Assembly service, which provides both  
612 raw output contigs from specific assembly algorithms and contigs of the “best” assembly as judged  
613 by the in-house PATRIC script ARAST. We ran the assembly using two different inputs: reads  
614 that had been processed by *kneaddata* as pairs, which has the advantage of utilizing mate-pairing  
615 information for longer total reads, and reads that had been processed by *kneaddata* after pairs were  
616 concatenated into a single file, which has the advantage of keeping reads whose mates failed  
617 trimming.

618 Both the raw SPAdes assembly algorithm contigs[165] and the best assembly contigs were  
619 then processed using the Metagenomics Binning service, which assigns contigs to specific  
620 organisms and annotates the bin's genome. Quality measures were used to define bins as either  
621 "good", "acceptable", or "bad" according to the criteria in Additional Table 3, and only "good" or  
622 "acceptable" bins were used moving forward. When more than one binning strategy (paired  
623 assembly or single assembly, SPAdes contigs or best contigs) called a particular bin as "good" or  
624 "acceptable", quality measures from the four strategies were compared and the highest-quality bin  
625 for a given species of interest was chosen for ARG analysis. Finally, only bins of species present  
626 at 0.1% or greater relative abundance in the corresponding sample were selected for further  
627 analysis. A list of bins used, their source, and quality measures can be found in Additional Table  
628 4.

#### 629 Taxonomic Biomarker Analysis:

630 LEfSe was used to identify potential biomarkers distinguishing levofloxacin-treated  
631 samples[95]. In all cases (taxonomic abundances, MetaCyc pathways, KEGG orthologs, GO  
632 terms, ARGs), data was formatted into csv files and uploaded to the Galaxy webserver. LEfSe was  
633 run under default parameters for biomarker detection, comparing either all pre-levofloxacin to all  
634 post-levofloxacin or immediately pre-levofloxacin to immediately post-levofloxacin. LEfSe was  
635 also used to compare genus-level taxonomic abundance outputs from Kraken2/Bracken2 and  
636 QIIME2, again under default parameters.

637

#### 638 **DECLARATIONS**

639 Ethics Approval and Consent to Participate: Approval for the SPREAD study was obtained from  
640 the Institutional Review Board committee at Hebrew SeniorLife.

641 Consent for Publication: Not applicable

642 Availability of Data and Material: The underlying sequencing data for the current study are  
643 available in the NCBI Short Read Archive repository; 16S rRNA and shotgun metagenomics data  
644 for the levofloxacin samples can be found at BioProject accession number PRJNA573963  
645 (<http://www.ncbi.nlm.nih.gov/bioproject/573963>) and shotgun metagenomics data for the test  
646 dataset can be found at BioProject accession number PRJNA531921  
647 (<https://www.ncbi.nlm.nih.gov/bioproject/531921>). Analysis code and data generated from this  
648 study can be found in Additional File 1 and Additional Data 1-4 of this published article,  
649 respectively.

650 Competing Interests: The authors declare no competing interests.

651 Funding: This study was funded by: the National Institute of General Medical Sciences  
652 institutional development award P20GM121344 for the COBRE Center for Antimicrobial  
653 Resistance and Therapeutic Discovery at Brown University (PB), the Centers for Disease Control  
654 and Prevention award 200-2016-91939 (EMCD), the National Institutes of Allergy and Infectious  
655 Diseases award K24AI119158 (EMCD), the National Institute of Aging award R01AG032982  
656 (EMCD), and the Millennium Nucleus for Collaborative Research on Bacterial Resistance  
657 (MICROB-R) supported by the Millennium Scientific Initiative of the Ministry of Economy,  
658 Development and Tourism (Chile) (RA).

659 Author's Contributions: ADR conceptualized the project, performed analysis, generated figures,  
660 and wrote the manuscript. RA collected the data and contributed to manuscript preparation. EMCD  
661 collected the data and contributed to manuscript preparation. PB conceptualized the project and  
662 wrote the manuscript. All authors read and approved the final manuscript.

663 Acknowledgements: The authors acknowledge the laboratory of Dr. Martin Blaser and the New  
664 York University Langone Medical Center Genome Technology Core, which prepared  
665 metagenomic libraries and performed all 16S rRNA and shotgun metagenomics sequencing for  
666 this study.

667

## 668 **ADDITIONAL DATA FILES**

669 *Additional Data 1: Taxonomic Classifications from Shotgun Metagenomics Kraken2/Bracken2*

670 This file includes the relative abundances of the taxonomic classifications at the phylum, genus,  
671 and species level for both the initial levofloxacin-treated dataset (tabs 1, 2, and 3) and the second,  
672 larger test dataset (tabs 4, 5, and 6). Additional Table 5 links the sample names used for the test  
673 dataset in this study with their identifiers in BioProject PRJNA531921.

674

675 *Additional Data 2: Taxonomic Classifications from 16S rRNA Sequencing QIIME2*

676 This file includes the relative abundances of the taxonomic classifications at the phylum (tab 1)  
677 and genus (tab 2) level for the initial levofloxacin-treated dataset.

678

679 *Additional Data 3: Metagenomic Classifications from HUMANN2*

680 This file includes the relative abundances of the MetaCyc pathway (tab 1), KEGG ortholog (tab  
681 2), and GO term (tab 3) outputs for the initial levofloxacin-treated dataset.

682

683 *Additional Data 4: Antimicrobial Resistance Gene profiles from DeepARG*

684 This file includes the relative abundances of antimicrobial class and specific resistance genes at  
685 the phylum, genus, and species level for the initial levofloxacin-treated dataset (tabs 1 and 2), the

686 second, larger test dataset (tabs 3 and 4), and the bins generated by PATRIC (tabs 5 and 6).  
687 Additional Table 5 links the sample names used for the test dataset in this study with their  
688 identifiers in BioProject PRJNA531921.

689

690 *Additional File 1: Code Used for Analysis*

691 This file includes the analysis code used for QIIME2, Kraken2 and Bracken, Phyloseq,  
692 HUMANN2, and DeepARG.

693

694 *List of Abbreviations in Manuscript and Figures*

|     |          |                                                               |
|-----|----------|---------------------------------------------------------------|
| 695 | A:A      | Aminoglycoside:Aminocoumarin                                  |
| 696 | AG       | Aminoglycoside                                                |
| 697 | AMR      | Antimicrobial Resistant                                       |
| 698 | ARG      | Antimicrobial Resistance Gene                                 |
| 699 | BC       | Bacitracin                                                    |
| 700 | BL       | Beta-Lactam                                                   |
| 701 | Bracken2 | Bayesian Reestimation of Abundance with KrakEN2               |
| 702 | DP       | Diaminopyrimidine                                             |
| 703 | FFM      | Fosfomicin                                                    |
| 704 | FMM      | Fosmidomycin                                                  |
| 705 | FQ       | Fluoroquinolone                                               |
| 706 | GP       | Glycopeptide                                                  |
| 707 | GO       | Gene Ontology                                                 |
| 708 | HUMANN2  | Human Microbiome Project Unified Metabolic Analysis Network 2 |



|     |        |                                                                         |
|-----|--------|-------------------------------------------------------------------------|
| 709 | KEGG   | Kyoto Encyclopedia of Genes and Genomes                                 |
| 710 | LEfSe  | Linear Discriminant Analysis Effect Size                                |
| 711 | MD     | Multidrug                                                               |
| 712 | MDRO   | Multidrug-Resistant Organism                                            |
| 713 | MLS    | Macrolide-Lincosamide-Streptogramin                                     |
| 714 | MP     | Mupirocin                                                               |
| 715 | MRSA   | Methicillin-resistant <i>Staphylococcus aureus</i>                      |
| 716 | NM     | Nitromidazole                                                           |
| 717 | OZ     | Oxazolidinone                                                           |
| 718 | PATRIC | Pathosystems Resource Integration Center                                |
| 719 | PC     | Phenicol                                                                |
| 720 | PMT    | Pleuromutilin                                                           |
| 721 | PMX    | Polymyxin                                                               |
| 722 | PT     | Peptide                                                                 |
| 723 | QIIME2 | Quantitative Insights Into Microbial Ecology 2                          |
| 724 | TC     | Tetracycline                                                            |
| 725 | SPREAD | Study of Pathogen Resistance and Exposure to Antimicrobials in Dementia |
| 726 | UC     | Unclassified                                                            |
| 727 |        |                                                                         |

728 **REFERENCES**

- 729 1. Centers for Disease Control and Prevention: **Antibiotic Resistance Threats in the United**  
730 **States, 2013**. US Department of Health and Human Services. Atlanta, GA, U.S.A.; 2013.
- 731 2. Aslam B, Wang W, Arshad MI, Khurshid M, Muzammil S, Rasool MH, Nisar MA, Alvi  
732 RF, Aslam MA, Qamar MU *et al*: **Antibiotic resistance: a rundown of a global crisis**.  
733 *Infect Drug Resist* 2018, **11**:1645-1658.
- 734 3. Michael CA, Dominey-Howes D, Labbate M: **The antimicrobial resistance crisis:**  
735 **causes, consequences, and management**. *Front Public Health* 2014, **2**:145.
- 736 4. Ventola CL: **The antibiotic resistance crisis: part 1: causes and threats**. *P T* 2015,  
737 **40**(4):277-283.
- 738 5. Paterson DL: **The role of antimicrobial management programs in optimizing antibiotic**  
739 **prescribing within hospitals**. *Clin Infect Dis* 2006, **42 Suppl 2**:S90-95.
- 740 6. Struelens MJ: **The epidemiology of antimicrobial resistance in hospital acquired**  
741 **infections: problems and possible solutions**. *BMJ* 1998, **317**(7159):652-654.
- 742 7. Mulvey MR, Simor AE: **Antimicrobial resistance in hospitals: how concerned should**  
743 **we be?** *CMAJ* 2009, **180**(4):408-415.
- 744 8. Cookson B: **Clinical significance of emergence of bacterial antimicrobial resistance in**  
745 **the hospital environment**. *J Appl Microbiol* 2005, **99**(5):989-996.
- 746 9. Cassone M, Mody L: **Colonization with Multi-Drug Resistant Organisms in Nursing**  
747 **Homes: Scope, Importance, and Management**. *Curr Geriatr Rep* 2015, **4**(1):87-95.
- 748 10. Aliyu S, Smaldone A, Larson E: **Prevalence of multidrug-resistant gram-negative**  
749 **bacteria among nursing home residents: A systematic review and meta-analysis**. *Am*  
750 *J Infect Control* 2017, **45**(5):512-518.

- 751 11. O'Fallon E, Gautam S, D'Agata EM: **Colonization with multidrug-resistant gram-**  
752 **negative bacteria: prolonged duration and frequent cocolonization.** *Clin Infect Dis*  
753 2009, **48**(10):1375-1381.
- 754 12. O'Fallon E, Kandel R, Schreiber R, D'Agata EM: **Acquisition of multidrug-resistant**  
755 **gram-negative bacteria: incidence and risk factors within a long-term care**  
756 **population.** *Infect Control Hosp Epidemiol* 2010, **31**(11):1148-1153.
- 757 13. Pop-Vicas A, Mitchell SL, Kandel R, Schreiber R, D'Agata EM: **Multidrug-resistant**  
758 **gram-negative bacteria in a long-term care facility: prevalence and risk factors.** *J Am*  
759 *Geriatr Soc* 2008, **56**(7):1276-1280.
- 760 14. Trick WE, Weinstein RA, DeMarais PL, Kuehnert MJ, Tomaska W, Nathan C, Rice TW,  
761 McAllister SK, Carson LA, Jarvis WR: **Colonization of skilled-care facility residents**  
762 **with antimicrobial-resistant pathogens.** *J Am Geriatr Soc* 2001, **49**(3):270-276.
- 763 15. van den Dool C, Haenen A, Leenstra T, Wallinga J: **The Role of Nursing Homes in the**  
764 **Spread of Antimicrobial Resistance Over the Healthcare Network.** *Infect Control Hosp*  
765 *Epidemiol* 2016, **37**(7):761-767.
- 766 16. Trick WE, Kuehnert MJ, Quirk SB, Arduino MJ, Agüero SM, Carson LA, Hill BC,  
767 Banerjee SN, Jarvis WR: **Regional dissemination of vancomycin-resistant enterococci**  
768 **resulting from interfacility transfer of colonized patients.** *J Infect Dis* 1999, **180**(2):391-  
769 396.
- 770 17. Morrill HJ, Caffrey AR, Jump RL, Dosa D, LaPlante KL: **Antimicrobial Stewardship in**  
771 **Long-Term Care Facilities: A Call to Action.** *J Am Med Dir Assoc* 2016, **17**(2):183  
772 e181-116.

- 773 18. Bonomo RA: **Multiple antibiotic-resistant bacteria in long-term-care facilities: An**  
774 **emerging problem in the practice of infectious diseases.** *Clin Infect Dis* 2000,  
775 **31(6):1414-1422.**
- 776 19. Daneman N, Gruneir A, Newman A, Fischer HD, Bronskill SE, Rochon PA, Anderson  
777 GM, Bell CM: **Antibiotic use in long-term care facilities.** *J Antimicrob Chemother* 2011,  
778 **66(12):2856-2863.**
- 779 20. van Buul L.W. vdSJT, Veenhuizen R.B., Achterberg W.P., Schellevis F.G., Essink  
780 R.T.G.M., van Benthem B.H.B., Natsch S., Hertogh C.M.P.M.: **Antibiotic Use and**  
781 **Resistance in Long Term Care Facilities.** *Journal of the American Medical Directors*  
782 *Association* 2012, **12(6):568.e561-568.e513.**
- 783 21. McGowan JE, Jr.: **Antimicrobial resistance in hospital organisms and its relation to**  
784 **antibiotic use.** *Rev Infect Dis* 1983, **5(6):1033-1048.**
- 785 22. Nicolle LE, Bentley DW, Garibaldi R, Neuhaus EG, Smith PW: **Antimicrobial use in**  
786 **long-term-care facilities. SHEA Long-Term-Care Committee.** *Infect Control Hosp*  
787 *Epidemiol* 2000, **21(8):537-545.**
- 788 23. Jones SR, Parker DF, Liebow ES, Kimbrough RC, 3rd, Frear RS: **Appropriateness of**  
789 **antibiotic therapy in long-term care facilities.** *Am J Med* 1987, **83(3):499-502.**
- 790 24. Dyar OJ, Pagani L, Pulcini C: **Strategies and challenges of antimicrobial stewardship**  
791 **in long-term care facilities.** *Clin Microbiol Infect* 2015, **21(1):10-19.**
- 792 25. Peron EP, Hirsch AA, Jury LA, Jump RL, Donskey CJ: **Another setting for stewardship:**  
793 **high rate of unnecessary antimicrobial use in a veterans affairs long-term care**  
794 **facility.** *J Am Geriatr Soc* 2013, **61(2):289-290.**

- 795 26. Loeb M: **Antibiotic use in long-term-care facilities: many unanswered questions.** *Infect*  
796 *Control Hosp Epidemiol* 2000, **21**(10):680-683.
- 797 27. D'Agata E, Loeb MB, Mitchell SL: **Challenges in assessing nursing home residents with**  
798 **advanced dementia for suspected urinary tract infections.** *J Am Geriatr Soc* 2013,  
799 **61**(1):62-66.
- 800 28. Mitchell SL, Shaffer ML, Loeb MB, Givens JL, Habtemariam D, Kiely DK, D'Agata E:  
801 **Infection management and multidrug-resistant organisms in nursing home residents**  
802 **with advanced dementia.** *JAMA Intern Med* 2014, **174**(10):1660-1667.
- 803 29. D'Agata E, Mitchell SL: **Patterns of antimicrobial use among nursing home residents**  
804 **with advanced dementia.** *Arch Intern Med* 2008, **168**(4):357-362.
- 805 30. Snyder GM, O'Fallon E, D'Agata EM: **Co-colonization with multiple different species**  
806 **of multidrug-resistant gram-negative bacteria.** *Am J Infect Control* 2011, **39**(6):506-  
807 510.
- 808 31. Mitchell SL, Shaffer ML, Kiely DK, Givens JL, D'Agata E: **The study of pathogen**  
809 **resistance and antimicrobial use in dementia: study design and methodology.** *Arch*  
810 *Gerontol Geriatr* 2013, **56**(1):16-22.
- 811 32. D'Agata EM, Habtemariam D, Mitchell S: **Multidrug-Resistant Gram-Negative**  
812 **Bacteria: Inter- and Intradissemination Among Nursing Homes of Residents With**  
813 **Advanced Dementia.** *Infect Control Hosp Epidemiol* 2015, **36**(8):930-935.
- 814 33. Human Microbiome Project C: **Structure, function and diversity of the healthy human**  
815 **microbiome.** *Nature* 2012, **486**(7402):207-214.
- 816 34. Lloyd-Price J, Abu-Ali G, Huttenhower C: **The healthy human microbiome.** *Genome*  
817 *Med* 2016, **8**(1):51.

- 818 35. Qin J, Li R, Raes J, Arumugam M, Burgdorf KS, Manichanh C, Nielsen T, Pons N,  
819 Levenez F, Yamada T *et al*: **A human gut microbial gene catalogue established by**  
820 **metagenomic sequencing**. *Nature* 2010, **464**(7285):59-65.
- 821 36. O'Toole P.W. CMJ: **Gut microbiota: Changes throughout the lifespan from infancy to**  
822 **elderly**. *International Dairy Journal* 2010, **20**(4):281-291.
- 823 37. Rowan-Nash AD, Korry BJ, Mylonakis E, Belenky P: **Cross-Domain and Viral**  
824 **Interactions in the Microbiome**. *Microbiol Mol Biol Rev* 2019, **83**(1).
- 825 38. Nagpal R, Mainali R, Ahmadi S, Wang S, Singh R, Kavanagh K, Kitzman DW,  
826 Kushugulova A, Marotta F, Yadav H: **Gut microbiome and aging: Physiological and**  
827 **mechanistic insights**. *Nutr Healthy Aging* 2018, **4**(4):267-285.
- 828 39. Odamaki T, Kato K, Sugahara H, Hashikura N, Takahashi S, Xiao JZ, Abe F, Osawa R:  
829 **Age-related changes in gut microbiota composition from newborn to centenarian: a**  
830 **cross-sectional study**. *BMC Microbiol* 2016, **16**:90.
- 831 40. Wang F, Yu T, Huang G, Cai D, Liang X, Su H, Zhu Z, Li D, Yang Y, Shen P *et al*: **Gut**  
832 **Microbiota Community and Its Assembly Associated with Age and Diet in Chinese**  
833 **Centenarians**. *J Microbiol Biotechnol* 2015, **25**(8):1195-1204.
- 834 41. Claesson MJ, Cusack S, O'Sullivan O, Greene-Diniz R, de Weerd H, Flannery E, Marchesi  
835 JR, Falush D, Dinan T, Fitzgerald G *et al*: **Composition, variability, and temporal**  
836 **stability of the intestinal microbiota of the elderly**. *Proc Natl Acad Sci U S A* 2011, **108**  
837 **Suppl 1**:4586-4591.
- 838 42. Salazar N, Valdes-Varela L, Gonzalez S, Gueimonde M, de Los Reyes-Gavilan CG:  
839 **Nutrition and the gut microbiome in the elderly**. *Gut Microbes* 2017, **8**(2):82-97.

- 840 43. Biagi E, Franceschi C, Rampelli S, Severgnini M, Ostan R, Turrioni S, Consolandi C,  
841 Quercia S, Scurti M, Monti D *et al*: **Gut Microbiota and Extreme Longevity**. *Curr Biol*  
842 2016, **26**(11):1480-1485.
- 843 44. Alfa MJ, Strang D, Tappia PS, Graham M, Van Domselaar G, Forbes JD, Laminman V,  
844 Olson N, DeGagne P, Bray D *et al*: **A randomized trial to determine the impact of a**  
845 **digestion resistant starch composition on the gut microbiome in older and mid-age**  
846 **adults**. *Clin Nutr* 2018, **37**(3):797-807.
- 847 45. Park SH, Kim KA, Ahn YT, Jeong JJ, Huh CS, Kim DH: **Comparative analysis of gut**  
848 **microbiota in elderly people of urbanized towns and longevity villages**. *BMC Microbiol*  
849 2015, **15**:49.
- 850 46. Biagi E, Nylund L, Candela M, Ostan R, Bucci L, Pini E, Nikkila J, Monti D, Satokari R,  
851 Franceschi C *et al*: **Through ageing, and beyond: gut microbiota and inflammatory**  
852 **status in seniors and centenarians**. *PLoS One* 2010, **5**(5):e10667.
- 853 47. Rampelli S, Candela M, Turrioni S, Biagi E, Collino S, Franceschi C, O'Toole PW, Brigidi  
854 P: **Functional metagenomic profiling of intestinal microbiome in extreme ageing**.  
855 *Aging (Albany NY)* 2013, **5**(12):902-912.
- 856 48. Santoro A, Ostan R, Candela M, Biagi E, Brigidi P, Capri M, Franceschi C: **Gut**  
857 **microbiota changes in the extreme decades of human life: a focus on centenarians**.  
858 *Cell Mol Life Sci* 2018, **75**(1):129-148.
- 859 49. Claesson MJ, Jeffery IB, Conde S, Power SE, O'Connor EM, Cusack S, Harris HM,  
860 Coakley M, Lakshminarayanan B, O'Sullivan O *et al*: **Gut microbiota composition**  
861 **correlates with diet and health in the elderly**. *Nature* 2012, **488**(7410):178-184.

- 862 50. Ticinesi A, Milani C, Lauretani F, Nouvenne A, Mancabelli L, Lugli GA, Turrone F,  
863 Duranti S, Mangifesta M, Viappiani A *et al*: **Gut microbiota composition is associated**  
864 **with polypharmacy in elderly hospitalized patients**. *Sci Rep* 2017, **7**(1):11102.
- 865 51. van Tongeren SP, Slaets JP, Harmsen HJ, Welling GW: **Fecal microbiota composition**  
866 **and frailty**. *Appl Environ Microbiol* 2005, **71**(10):6438-6442.
- 867 52. Fish DN, Chow AT: **The clinical pharmacokinetics of levofloxacin**. *Clin Pharmacokinet*  
868 1997, **32**(2):101-119.
- 869 53. Chien SC, Rogge MC, Gisclon LG, Curtin C, Wong F, Natarajan J, Williams RR, Fowler  
870 CL, Cheung WK, Chow AT: **Pharmacokinetic profile of levofloxacin following once-**  
871 **daily 500-milligram oral or intravenous doses**. *Antimicrob Agents Chemother* 1997,  
872 **41**(10):2256-2260.
- 873 54. Anderson VR, Perry CM: **Levofloxacin : a review of its use as a high-dose, short-course**  
874 **treatment for bacterial infection**. *Drugs* 2008, **68**(4):535-565.
- 875 55. Inagaki Y, Nakaya R, Chida T, Hashimoto S: **The effect of levofloxacin, an optically-**  
876 **active isomer of ofloxacin, on fecal microflora in human volunteers**. *Jpn J Antibiot*  
877 1992, **45**(3):241-252.
- 878 56. Edlund C, Nord CE: **Effect of quinolones on intestinal ecology**. *Drugs* 1999, **58** Suppl  
879 **2**:65-70.
- 880 57. Edlund C, Nord CE: **Effect on the human normal microflora of oral antibiotics for**  
881 **treatment of urinary tract infections**. *J Antimicrob Chemother* 2000, **46** Suppl A:41-48.
- 882 58. Edlund C, Sjostedt S, Nord CE: **Comparative effects of levofloxacin and ofloxacin on**  
883 **the normal oral and intestinal microflora**. *Scand J Infect Dis* 1997, **29**(4):383-386.



- 884 59. Bhalodi AA, van Engelen TSR, Virk HS, Wiersinga WJ: **Impact of antimicrobial therapy**  
885 **on the gut microbiome.** *J Antimicrob Chemother* 2019, **74**(Supplement\_1):i6-i15.
- 886 60. Ziegler M, Han JH, Landsburg D, Pegues D, Reese E, Gilmar C, Gorman T, Bink K,  
887 Moore A, Kelly BJ *et al*: **Impact of Levofloxacin for the Prophylaxis of Bloodstream**  
888 **Infection on the Gut Microbiome in Patients With Hematologic Malignancy.** *Open*  
889 *Forum Infect Dis* 2019, **6**(7):ofz252.
- 890 61. Sullivan A, Edlund C, Nord CE: **Effect of antimicrobial agents on the ecological balance**  
891 **of human microflora.** *Lancet Infect Dis* 2001, **1**(2):101-114.
- 892 62. de Lastours V, Chau F, Roy C, Larroque B, Fantin B: **Emergence of quinolone resistance**  
893 **in the microbiota of hospitalized patients treated or not with a fluoroquinolone.** *J*  
894 *Antimicrob Chemother* 2014, **69**(12):3393-3400.
- 895 63. Lautenbach E, Strom BL, Nachamkin I, Bilker WB, Marr AM, Larosa LA, Fishman NO:  
896 **Longitudinal trends in fluoroquinolone resistance among Enterobacteriaceae isolates**  
897 **from inpatients and outpatients, 1989-2000: differences in the emergence and**  
898 **epidemiology of resistance across organisms.** *Clin Infect Dis* 2004, **38**(5):655-662.
- 899 64. Dalhoff A: **Global fluoroquinolone resistance epidemiology and implications for**  
900 **clinical use.** *Interdiscip Perspect Infect Dis* 2012, **2012**:976273.
- 901 65. Spellberg B, Doi Y: **The Rise of Fluoroquinolone-Resistant Escherichia coli in the**  
902 **Community: Scarier Than We Thought.** *J Infect Dis* 2015, **212**(12):1853-1855.
- 903 66. Acar JF, Goldstein FW: **Trends in bacterial resistance to fluoroquinolones.** *Clin Infect*  
904 *Dis* 1997, **24 Suppl 1**:S67-73.
- 905 67. Nordmann P, Poirel L: **Emergence of plasmid-mediated resistance to quinolones in**  
906 **Enterobacteriaceae.** *J Antimicrob Chemother* 2005, **56**(3):463-469.

- 907 68. Paterson DL: **Resistance in gram-negative bacteria: enterobacteriaceae.** *Am J Med*  
908 2006, **119**(6 Suppl 1):S20-28; discussion S62-70.
- 909 69. Ruppe E, Woerther PL, Barbier F: **Mechanisms of antimicrobial resistance in Gram-**  
910 **negative bacilli.** *Ann Intensive Care* 2015, **5**(1):61.
- 911 70. Wood DE, Salzberg SL: **Kraken: ultrafast metagenomic sequence classification using**  
912 **exact alignments.** *Genome Biol* 2014, **15**(3):R46.
- 913 71. Lu JB, F.P.; Thielen P.; Salzberg, S.L.: **Bracken: estimating species abundance in**  
914 **metagenomics data.** *PeerJ Computer Science* 2017;3:e104.
- 915 72. Weiner LM, Webb AK, Limbago B, Dudeck MA, Patel J, Kallen AJ, Edwards JR, Sievert  
916 DM: **Antimicrobial-Resistant Pathogens Associated With Healthcare-Associated**  
917 **Infections: Summary of Data Reported to the National Healthcare Safety Network at**  
918 **the Centers for Disease Control and Prevention, 2011-2014.** *Infect Control Hosp*  
919 *Epidemiol* 2016, **37**(11):1288-1301.
- 920 73. O'Donovan D, Corcoran GD, Lucey B, Sleator RD: **Campylobacter ureolyticus: a**  
921 **portrait of the pathogen.** *Virulence* 2014, **5**(4):498-506.
- 922 74. Salem N, Salem L, Saber S, Ismail G, Bluth MH: **Corynebacterium urealyticum: a**  
923 **comprehensive review of an understated organism.** *Infect Drug Resist* 2015, **8**:129-145.
- 924 75. Agudelo Higueta NI, Huycke MM: **Enterococcal Disease, Epidemiology, and**  
925 **Implications for Treatment.** In: *Enterococci: From Commensals to Leading Causes of*  
926 *Drug Resistant Infection.* Edited by Gilmore MS, Clewell DB, Ike Y, Shankar N. Boston;  
927 2014.
- 928 76. Fiore E, Van Tyne D, Gilmore MS: **Pathogenicity of Enterococci.** *Microbiol Spectr* 2019,  
929 **7**(4).

- 930 77. Conway T, Cohen PS: **Commensal and Pathogenic Escherichia coli Metabolism in the**  
931 **Gut.** *Microbiol Spectr* 2015, **3**(3).
- 932 78. Woodward SE, Krekhno Z, Finlay BB: **Here, there, and everywhere: How pathogenic**  
933 **E. coli sense and respond to gastrointestinal biogeography.** *Cell Microbiol*  
934 2019:e13107.
- 935 79. Baqi M, Mazzulli T: **Oligella infections: Case report and review of the literature.** *Can*  
936 *J Infect Dis* 1996, **7**(6):377-379.
- 937 80. Graham DR, Band JD, Thornsberry C, Hollis DG, Weaver RE: **Infections caused by**  
938 **Moraxella, Moraxella urethralis, Moraxella-like groups M-5 and M-6, and Kingella**  
939 **kingae in the United States, 1953-1980.** *Rev Infect Dis* 1990, **12**(3):423-431.
- 940 81. Pugliese A, Pacris B, Schoch PE, Cunha BA: **Oligella urethralis urosepsis.** *Clin Infect*  
941 *Dis* 1993, **17**(6):1069-1070.
- 942 82. Wilmer AW, P.; Press, N.; Leung, V.; Romney, M.; Champagne, S.: **Oligella urethralis**  
943 **as a Cause of Urosepsis.** *Clinical Microbiology Newsletter* 2013, **35**(10):84-85.
- 944 83. Schaffer JN, Pearson MM: **Proteus mirabilis and Urinary Tract Infections.** *Microbiol*  
945 *Spectr* 2015, **3**(5).
- 946 84. Chen CY, Chen YH, Lu PL, Lin WR, Chen TC, Lin CY: **Proteus mirabilis urinary tract**  
947 **infection and bacteremia: risk factors, clinical presentation, and outcomes.** *J*  
948 *Microbiol Immunol Infect* 2012, **45**(3):228-236.
- 949 85. Wie SH: **Clinical significance of Providencia bacteremia or bacteriuria.** *Korean J*  
950 *Intern Med* 2015, **30**(2):167-169.

- 951 86. Kurmasheva N, Vorobiev V, Sharipova M, Efremova T, Mardanova A: **The Potential**  
952 **Virulence Factors of Providencia stuartii: Motility, Adherence, and Invasion.** *Biomed*  
953 *Res Int* 2018, **2018**:3589135.
- 954 87. Bassetti M, Vena A, Croxatto A, Righi E, Guery B: **How to manage Pseudomonas**  
955 **aeruginosa infections.** *Drugs Context* 2018, **7**:212527.
- 956 88. Mittal R, Aggarwal S, Sharma S, Chhibber S, Harjai K: **Urinary tract infections caused**  
957 **by Pseudomonas aeruginosa: a minireview.** *J Infect Public Health* 2009, **2**(3):101-111.
- 958 89. Gordon RJ, Lowy FD: **Pathogenesis of methicillin-resistant Staphylococcus aureus**  
959 **infection.** *Clin Infect Dis* 2008, **46 Suppl 5**:S350-359.
- 960 90. Lowy FD: **Staphylococcus aureus infections.** *N Engl J Med* 1998, **339**(8):520-532.
- 961 91. Naimi TS, LeDell KH, Como-Sabetti K, Borchardt SM, Boxrud DJ, Etienne J, Johnson  
962 SK, Vandenesch F, Fridkin S, O'Boyle C *et al*: **Comparison of community- and health**  
963 **care-associated methicillin-resistant Staphylococcus aureus infection.** *JAMA* 2003,  
964 **290**(22):2976-2984.
- 965 92. Becker K, Heilmann C, Peters G: **Coagulase-negative staphylococci.** *Clin Microbiol Rev*  
966 2014, **27**(4):870-926.
- 967 93. Czekaj T, Ciszewski M, Szewczyk EM: **Staphylococcus haemolyticus - an emerging**  
968 **threat in the twilight of the antibiotics age.** *Microbiology* 2015, **161**(11):2061-2068.
- 969 94. Froggatt JW, Johnston JL, Galetto DW, Archer GL: **Antimicrobial resistance in**  
970 **nosocomial isolates of Staphylococcus haemolyticus.** *Antimicrob Agents Chemother*  
971 1989, **33**(4):460-466.
- 972 95. Segata N, Izard J, Waldron L, Gevers D, Miropolsky L, Garrett WS, Huttenhower C:  
973 **Metagenomic biomarker discovery and explanation.** *Genome Biol* 2011, **12**(6):R60.

- 974 96. Caporaso JG, Kuczynski J, Stombaugh J, Bittinger K, Bushman FD, Costello EK, Fierer  
975 N, Pena AG, Goodrich JK, Gordon JI *et al*: **QIIME allows analysis of high-throughput**  
976 **community sequencing data**. *Nat Methods* 2010, **7**(5):335-336.
- 977 97. Franzosa EA, McIver LJ, Rahnnavard G, Thompson LR, Schirmer M, Weingart G, Lipson  
978 KS, Knight R, Caporaso JG, Segata N *et al*: **Species-level functional profiling of**  
979 **metagenomes and metatranscriptomes**. *Nat Methods* 2018, **15**(11):962-968.
- 980 98. Arango-Argoty G, Garner E, Pruden A, Heath LS, Vikesland P, Zhang L: **DeepARG: a**  
981 **deep learning approach for predicting antibiotic resistance genes from metagenomic**  
982 **data**. *Microbiome* 2018, **6**(1):23.
- 983 99. Hiramatsu K: **Molecular evolution of MRSA**. *Microbiol Immunol* 1995, **39**(8):531-543.
- 984 100. Hiramatsu K, Cui L, Kuroda M, Ito T: **The emergence and evolution of methicillin-**  
985 **resistant Staphylococcus aureus**. *Trends Microbiol* 2001, **9**(10):486-493.
- 986 101. Tsubakishita S, Kuwahara-Arai K, Sasaki T, Hiramatsu K: **Origin and molecular**  
987 **evolution of the determinant of methicillin resistance in staphylococci**. *Antimicrob*  
988 *Agents Chemother* 2010, **54**(10):4352-4359.
- 989 102. Enright MC, Robinson DA, Randle G, Feil EJ, Grundmann H, Spratt BG: **The**  
990 **evolutionary history of methicillin-resistant Staphylococcus aureus (MRSA)**. *Proc*  
991 *Natl Acad Sci U S A* 2002, **99**(11):7687-7692.
- 992 103. Smith AM, Klugman KP: **Alterations in PBP 1A essential-for high-level penicillin**  
993 **resistance in Streptococcus pneumoniae**. *Antimicrob Agents Chemother* 1998,  
994 **42**(6):1329-1333.
- 995 104. Zapun A, Contreras-Martel C, Vernet T: **Penicillin-binding proteins and beta-lactam**  
996 **resistance**. *FEMS Microbiol Rev* 2008, **32**(2):361-385.

- 997 105. Brannigan JA, Tirodimos IA, Zhang QY, Dowson CG, Spratt BG: **Insertion of an extra**  
998 **amino acid is the main cause of the low affinity of penicillin-binding protein 2 in**  
999 **penicillin-resistant strains of *Neisseria gonorrhoeae*.** *Mol Microbiol* 1990, **4(6):913-**  
1000 **919.**
- 1001 106. Dowson CG, Jephcott AE, Gough KR, Spratt BG: **Penicillin-binding protein 2 genes of**  
1002 **non-beta-lactamase-producing, penicillin-resistant strains of *Neisseria gonorrhoeae*.**  
1003 *Mol Microbiol* 1989, **3(1):35-41.**
- 1004 107. Thulin S, Olcen P, Fredlund H, Unemo M: **Total variation in the penA gene of *Neisseria***  
1005 **meningitidis: correlation between susceptibility to beta-lactam antibiotics and penA**  
1006 **gene heterogeneity.** *Antimicrob Agents Chemother* 2006, **50(10):3317-3324.**
- 1007 108. Beceiro AB, G.: **Class C Beta-Lactamases: An Increasing Problem Worldwide.**  
1008 *Reviews in Medical Microbiology* 2004, **15(4):141-152.**
- 1009 109. Garvey MI, Baylay AJ, Wong RL, Piddock LJ: **Overexpression of patA and patB, which**  
1010 **encode ABC transporters, is associated with fluoroquinolone resistance in clinical**  
1011 **isolates of *Streptococcus pneumoniae*.** *Antimicrob Agents Chemother* 2011, **55(1):190-**  
1012 **196.**
- 1013 110. El Garch F, Lismond A, Piddock LJ, Courvalin P, Tulkens PM, Van Bambeke F:  
1014 **Fluoroquinolones induce the expression of patA and patB, which encode ABC efflux**  
1015 **pumps in *Streptococcus pneumoniae*.** *J Antimicrob Chemother* 2010, **65(10):2076-2082.**
- 1016 111. Hernando-Amado S, Blanco P, Alcalde-Rico M, Corona F, Reales-Calderon JA, Sanchez  
1017 MB, Martinez JL: **Multidrug efflux pumps as main players in intrinsic and acquired**  
1018 **resistance to antimicrobials.** *Drug Resist Updat* 2016, **28:13-27.**

- 1019 112. Sato T, Yokota S, Uchida I, Okubo T, Usui M, Kusumoto M, Akiba M, Fujii N, Tamura  
1020 Y: **Fluoroquinolone resistance mechanisms in an Escherichia coli isolate, HUE1,**  
1021 **without quinolone resistance-determining region mutations.** *Front Microbiol* 2013,  
1022 4:125.
- 1023 113. Li XZ, Plesiat P, Nikaido H: **The challenge of efflux-mediated antibiotic resistance in**  
1024 **Gram-negative bacteria.** *Clin Microbiol Rev* 2015, **28**(2):337-418.
- 1025 114. Chow J, Tang H, Mazmanian SK: **Pathobionts of the gastrointestinal microbiota and**  
1026 **inflammatory disease.** *Curr Opin Immunol* 2011, **23**(4):473-480.
- 1027 115. Dzutsev A, Trinchieri G: **Proteus mirabilis: The Enemy Within.** *Immunity* 2015,  
1028 **42**(4):602-604.
- 1029 116. Butto LF, Schaubeck M, Haller D: **Mechanisms of Microbe-Host Interaction in Crohn's**  
1030 **Disease: Dysbiosis vs. Pathobiont Selection.** *Front Immunol* 2015, **6**:555.
- 1031 117. Mirsepasi-Lauridsen HCV, B.A.; Krogfelt, K.A.; Petersen, A.M.: **Escherichia coli**  
1032 **pathobionts associated with inflammatory bowel disease.** *Clinical Microbiology*  
1033 *Reviews* 2019:32:e00060-00018.
- 1034 118. Yang HM-L, H.C.; Struve, C.; Allaire, J.M.; Bosman, E.; Sivignon, A.; Vogl, W.; Ma, C.;  
1035 Reid, G.; Li, X.; Petersen, A.M.; Jacobson, K.; Gouin, S.; Barnich, N.; Yu, H.; Krogfelt,  
1036 K.A.; Vallance, B.A.: **Ulcerative Colitis-associated E. coli Pathobionts Potentiate**  
1037 **Colitis in Susceptible Hosts.** *The Journal of Immunology* 2019, **202**(1):192.193.
- 1038 119. Hamilton AL, Kamm MA, Ng SC, Morrison M: **Proteus spp. as Putative**  
1039 **Gastrointestinal Pathogens.** *Clin Microbiol Rev* 2018, **31**(3).

- 1040 120. Archambaud C, Derre-Bobillot A, Lapaque N, Rigottier-Gois L, Serror P: **Intestinal**  
1041 **translocation of enterococci requires a threshold level of enterococcal overgrowth in**  
1042 **the lumen.** *Sci Rep* 2019, **9**(1):8926.
- 1043 121. Overturf GD, Wilkins J, Ressler R: **Emergence of resistance of *Providencia stuartii* to**  
1044 **multiple antibiotics: speciation and biochemical characterization of *Providencia*.** *J*  
1045 *Infect Dis* 1974, **129**(3):353-357.
- 1046 122. McHale PJ, Keane CT, Dougan G: **Antibiotic resistance in *Providencia stuartii* isolated**  
1047 **in hospitals.** *J Clin Microbiol* 1981, **13**(6):1099-1104.
- 1048 123. Hawkey PM: ***Providencia stuartii*: a review of a multiply antibiotic-resistant**  
1049 **bacterium.** *J Antimicrob Chemother* 1984, **13**(3):209-226.
- 1050 124. Warren JW: ***Providencia stuartii*: a common cause of antibiotic-resistant bacteriuria**  
1051 **in patients with long-term indwelling catheters.** *Rev Infect Dis* 1986, **8**(1):61-67.
- 1052 125. Oikonomou O, Liakopoulos A, Phee LM, Betts J, Mevius D, Wareham DW: ***Providencia***  
1053 ***stuartii* Isolates from Greece: Co-Carriage of Cephalosporin (*bla*SHV-5, *bla*VEB-1),**  
1054 **Carbapenem (*bla*VIM-1), and Aminoglycoside (*rmtB*) Resistance Determinants by a**  
1055 **Multidrug-Resistant Outbreak Clone.** *Microb Drug Resist* 2016, **22**(5):379-386.
- 1056 126. Barros EM, Ceotto H, Bastos MC, Dos Santos KR, Giambiagi-Demarval M:  
1057 ***Staphylococcus haemolyticus* as an important hospital pathogen and carrier of**  
1058 **methicillin resistance genes.** *J Clin Microbiol* 2012, **50**(1):166-168.
- 1059 127. Maleki A, Ghafourian S, Taherikalani M, Soroush S: **Alarming and Threatening Signals**  
1060 **from Health Centers About Multi Drug Resistance *Staphylococcus haemolyticus*.**  
1061 *Infect Disord Drug Targets* 2019, **19**(2):118-127.



- 1062 128. Costa SS, Viveiros M, Amaral L, Couto I: **Multidrug Efflux Pumps in Staphylococcus**  
1063 **aureus: an Update.** *Open Microbiol J* 2013, **7**:59-71.
- 1064 129. Truong-Bolduc QC, Dunman PM, Strahilevitz J, Projan SJ, Hooper DC: **MgrA is a**  
1065 **multiple regulator of two new efflux pumps in Staphylococcus aureus.** *J Bacteriol*  
1066 2005, **187**(7):2395-2405.
- 1067 130. Lina G, Quaglia A, Reverdy ME, Leclercq R, Vandenesch F, Etienne J: **Distribution of**  
1068 **genes encoding resistance to macrolides, lincosamides, and streptogramins among**  
1069 **staphylococci.** *Antimicrob Agents Chemother* 1999, **43**(5):1062-1066.
- 1070 131. Ross JI, Eady EA, Cove JH, Cunliffe WJ, Baumberg S, Wootton JC: **Inducible**  
1071 **erythromycin resistance in staphylococci is encoded by a member of the ATP-binding**  
1072 **transport super-gene family.** *Mol Microbiol* 1990, **4**(7):1207-1214.
- 1073 132. Singh L, Cariappa MP, Kaur M: **Klebsiella oxytoca: An emerging pathogen?** *Med J*  
1074 *Armed Forces India* 2016, **72**(Suppl 1):S59-S61.
- 1075 133. Moradigaravand D, Martin V, Peacock SJ, Parkhill J: **Population structure of multidrug**  
1076 **resistant Klebsiella oxytoca within hospitals across the UK and Ireland identifies**  
1077 **sharing of virulence and resistance genes with K. pneumoniae.** *Genome Biol Evol* 2017.
- 1078 134. Liu H, Zhu J, Hu Q, Rao X: **Morganella morganii, a non-negligent opportunistic**  
1079 **pathogen.** *Int J Infect Dis* 2016, **50**:10-17.
- 1080 135. Noel GJ: **A Review of Levofloxacin for the Treatment of Bacterial Infections.** *Clinical*  
1081 *Medicine Insights: Therapeutics* 2009, **1**.
- 1082 136. Bush LM, Chaparro-Rojas F, Okeh V, Etienne J: **Cumulative clinical experience from**  
1083 **over a decade of use of levofloxacin in urinary tract infections: critical appraisal and**  
1084 **role in therapy.** *Infect Drug Resist* 2011, **4**:177-189.

- 1085 137. Croom KF, Goa KL: **Levofloxacin: a review of its use in the treatment of bacterial**  
1086 **infections in the United States.** *Drugs* 2003, **63**(24):2769-2802.
- 1087 138. Deshpande A, Pant C, Jain A, Fraser TG, Rolston DD: **Do fluoroquinolones predispose**  
1088 **patients to Clostridium difficile associated disease? A review of the evidence.** *Curr*  
1089 *Med Res Opin* 2008, **24**(2):329-333.
- 1090 139. Mehta RS, Abu-Ali GS, Drew DA, Lloyd-Price J, Subramanian A, Lochhead P, Joshi AD,  
1091 Ivey KL, Khalili H, Brown GT *et al*: **Stability of the human faecal microbiome in a**  
1092 **cohort of adult men.** *Nat Microbiol* 2018, **3**(3):347-355.
- 1093 140. Liskiewicz P, Pelka-Wysiecka J, Kaczmarczyk M, Loniewski I, Wronski M, Baba-Kubis  
1094 A, Skonieczna-Zydecka K, Marlicz W, Misiak B, Samochowiec J: **Fecal Microbiota**  
1095 **Analysis in Patients Going through a Depressive Episode during Treatment in a**  
1096 **Psychiatric Hospital Setting.** *J Clin Med* 2019, **8**(2).
- 1097 141. Turnbaugh PJ, Hamady M, Yatsunencko T, Cantarel BL, Duncan A, Ley RE, Sogin ML,  
1098 Jones WJ, Roe BA, Affourtit JP *et al*: **A core gut microbiome in obese and lean twins.**  
1099 *Nature* 2009, **457**(7228):480-484.
- 1100 142. Davies EV, James CE, Williams D, O'Brien S, Fothergill JL, Haldenby S, Paterson S,  
1101 Winstanley C, Brockhurst MA: **Temperate phages both mediate and drive adaptive**  
1102 **evolution in pathogen biofilms.** *Proc Natl Acad Sci U S A* 2016, **113**(29):8266-8271.
- 1103 143. van Schaik W: **The human gut resistome.** *Philos Trans R Soc Lond B Biol Sci* 2015,  
1104 **370**(1670):20140087.
- 1105 144. Francino MP: **Antibiotics and the Human Gut Microbiome: Dysbioses and**  
1106 **Accumulation of Resistances.** *Front Microbiol* 2015, **6**:1543.

- 1107 145. Penders J, Stobberingh EE, Savelkoul PH, Wolffs PF: **The human microbiome as a**  
1108 **reservoir of antimicrobial resistance.** *Front Microbiol* 2013, **4**:87.
- 1109 146. Hu Y, Yang X, Qin J, Lu N, Cheng G, Wu N, Pan Y, Li J, Zhu L, Wang X *et al*:  
1110 **Metagenome-wide analysis of antibiotic resistance genes in a large cohort of human**  
1111 **gut microbiota.** *Nat Commun* 2013, **4**:2151.
- 1112 147. Jackson RW, Vinatzer B, Arnold DL, Dorus S, Murillo J: **The influence of the accessory**  
1113 **genome on bacterial pathogen evolution.** *Mob Genet Elements* 2011, **1**(1):55-65.
- 1114 148. Scott KP: **The role of conjugative transposons in spreading antibiotic resistance**  
1115 **between bacteria that inhabit the gastrointestinal tract.** *Cell Mol Life Sci* 2002,  
1116 **59**(12):2071-2082.
- 1117 149. Salyers AA, Gupta A, Wang Y: **Human intestinal bacteria as reservoirs for antibiotic**  
1118 **resistance genes.** *Trends Microbiol* 2004, **12**(9):412-416.
- 1119 150. Kazimierczak KA, Scott KP: **Antibiotics and resistance genes: influencing the**  
1120 **microbial ecosystem in the gut.** *Adv Appl Microbiol* 2007, **62**:269-292.
- 1121 151. Martinez JL, Coque TM, Baquero F: **What is a resistance gene? Ranking risk in**  
1122 **resistomes.** *Nat Rev Microbiol* 2015, **13**(2):116-123.
- 1123 152. Budding AE, Grasman ME, Eck A, Bogaards JA, Vandenbroucke-Grauls CM, van  
1124 Bodegraven AA, Savelkoul PH: **Rectal swabs for analysis of the intestinal microbiota.**  
1125 *PLoS One* 2014, **9**(7):e101344.
- 1126 153. Bassis CM, Moore NM, Lolans K, Seekatz AM, Weinstein RA, Young VB, Hayden MK,  
1127 Program CDCPE: **Comparison of stool versus rectal swab samples and storage**  
1128 **conditions on bacterial community profiles.** *BMC Microbiol* 2017, **17**(1):78.

- 1129 154. Biehl LM, Garzetti D, Farowski F, Ring D, Koeppel MB, Rohde H, Schafhausen P, Stecher  
1130 B, Vehreschild M: **Usability of rectal swabs for microbiome sampling in a cohort study**  
1131 **of hematological and oncological patients.** *PLoS One* 2019, **14**(4):e0215428.
- 1132 155. Fair K, Dunlap DG, Fitch A, Bogdanovich T, Methe B, Morris A, McVerry BJ, Kitsios  
1133 GD: **Rectal Swabs from Critically Ill Patients Provide Discordant Representations of**  
1134 **the Gut Microbiome Compared to Stool Samples.** *mSphere* 2019, **4**(4).
- 1135 156. Snyder GM, D'Agata EM: **Diagnostic accuracy of surveillance cultures to detect**  
1136 **gastrointestinal colonization with multidrug-resistant gram-negative bacteria.** *Am J*  
1137 *Infect Control* 2012, **40**(5):474-476.
- 1138 157. Callahan BJ, McMurdie PJ, Rosen MJ, Han AW, Johnson AJ, Holmes SP: **DADA2: High-**  
1139 **resolution sample inference from Illumina amplicon data.** *Nat Methods* 2016,  
1140 **13**(7):581-583.
- 1141 158. Quast C, Pruesse E, Yilmaz P, Gerken J, Schweer T, Yarza P, Peplies J, Glockner FO: **The**  
1142 **SILVA ribosomal RNA gene database project: improved data processing and web-**  
1143 **based tools.** *Nucleic Acids Res* 2013, **41**(Database issue):D590-596.
- 1144 159. McIver LJ, Abu-Ali G, Franzosa EA, Schwager R, Morgan XC, Waldron L, Segata N,  
1145 Huttenhower C: **bioBakery: a meta'omic analysis environment.** *Bioinformatics* 2018,  
1146 **34**(7):1235-1237.
- 1147 160. Langmead B, Trapnell C, Pop M, Salzberg SL: **Ultrafast and memory-efficient**  
1148 **alignment of short DNA sequences to the human genome.** *Genome Biol* 2009,  
1149 **10**(3):R25.
- 1150 161. McMurdie PJ, Holmes S: **phyloseq: an R package for reproducible interactive analysis**  
1151 **and graphics of microbiome census data.** *PLoS One* 2013, **8**(4):e61217.

- 1152 162. McMurdie PJ, Holmes S: **Phyloseq: a bioconductor package for handling and analysis**  
1153 **of high-throughput phylogenetic sequence data.** *Pac Symp Biocomput* 2012:235-246.
- 1154 163. Dixon P: **VEGAN, a package of R functions for community ecology.** *J Veg Sci* 2009,  
1155 **14:927-930.**
- 1156 164. Wattam AR, Davis JJ, Assaf R, Boisvert S, Brettin T, Bun C, Conrad N, Dietrich EM, Disz  
1157 T, Gabbard JL *et al*: **Improvements to PATRIC, the all-bacterial Bioinformatics**  
1158 **Database and Analysis Resource Center.** *Nucleic Acids Res* 2017, **45(D1):D535-D542.**
- 1159 165. Nurk S, Meleshko D, Korobeynikov A, Pevzner PA: **metaSPAdes: a new versatile**  
1160 **metagenomic assembler.** *Genome Res* 2017, **27(5):824-834.**
- 1161

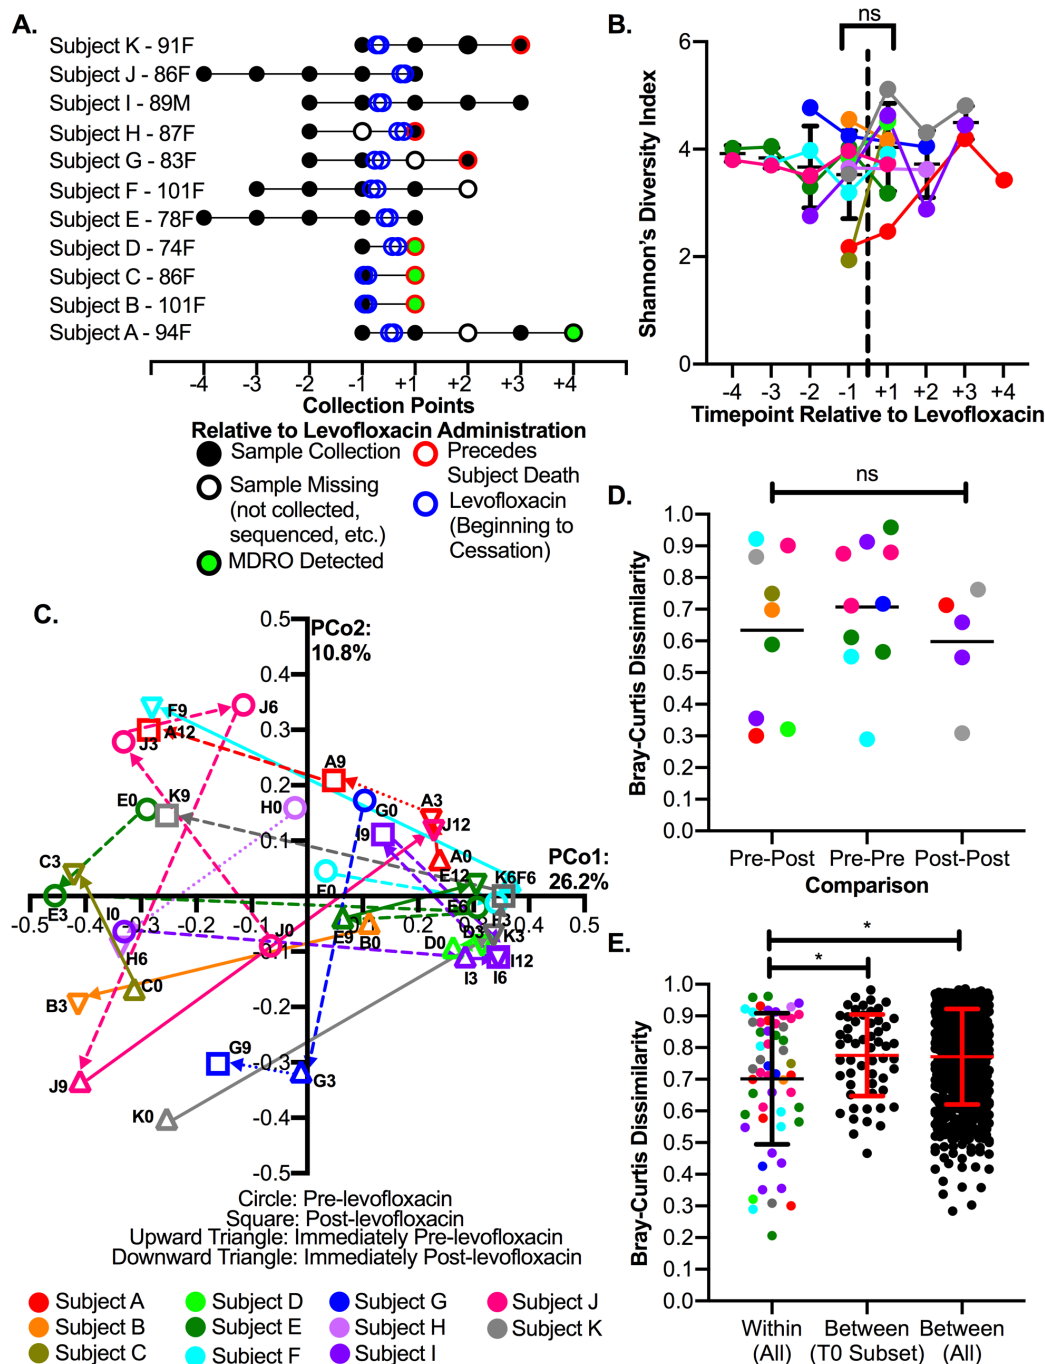

*Figure 1: Subject Overview and Diversity Metrics*

(A) Metagenomics sequencing was performed on longitudinal samples from eleven subjects from SPREAD who had received a single course of levofloxacin during their participation in the study. Points represent collection of samples, at intervals of approximately 3 months, relative to administration of levofloxacin. (B) Shannon diversity over time of all subjects. The dashed line indicates administration of levofloxacin.  $p = 0.175$  for immediately pre-levofloxacin vs. immediately post-levofloxacin samples and  $p = 0.1006$  for all pre-levofloxacin vs. all post-levofloxacin samples; Mann-Whitney test. (C) PCoA analysis of Bray-Curtis Dissimilarity. Solid arrows connect immediately pre- with immediately post-levofloxacin samples, dashed arrows connect other sequential samples, and dotted arrows connect samples where an intermediate sample is missing. (D) Within-subjects Bray-Curtis Dissimilarity of sequential samples.  $p = 0.6248$  between pre-levofloxacin samples, post-levofloxacin samples, or pre-post levofloxacin samples; ANOVA). (E) Overall within-subjects, T0 between-subjects, and overall between-subjects Bray-Curtis Dissimilarity.  $p = 0.0262$  for overall within-subjects vs. T0 between-subjects and  $p = 0.0175$  for overall within-subjects vs. overall between-subjects; t-test with Welch's correction.



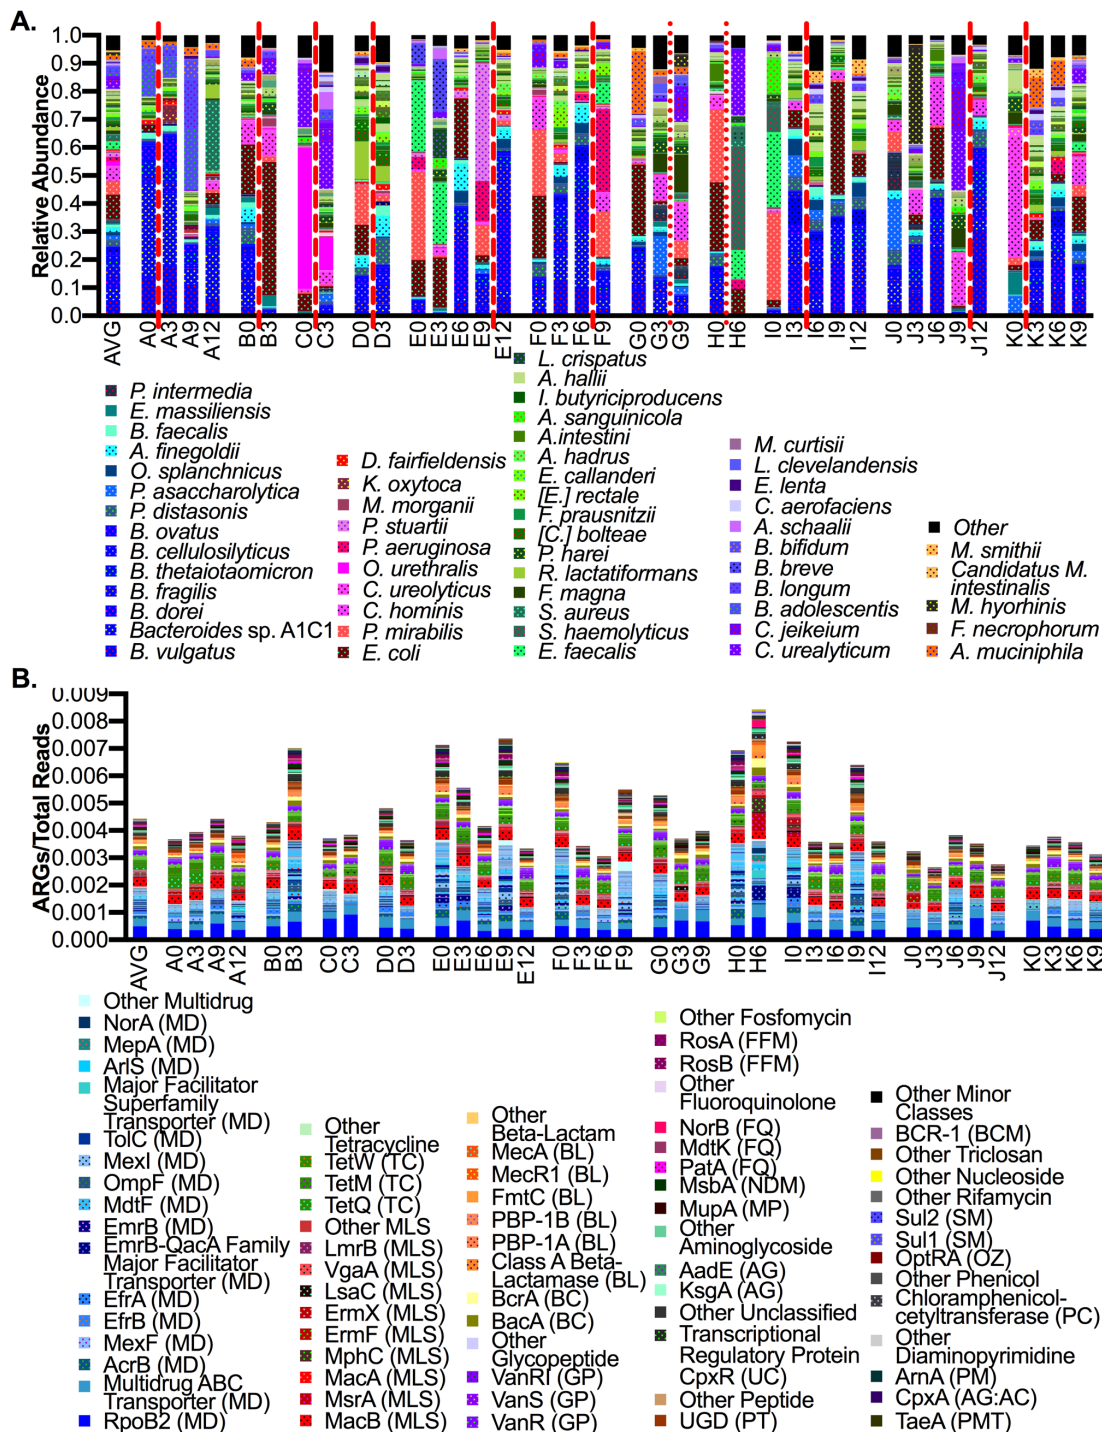

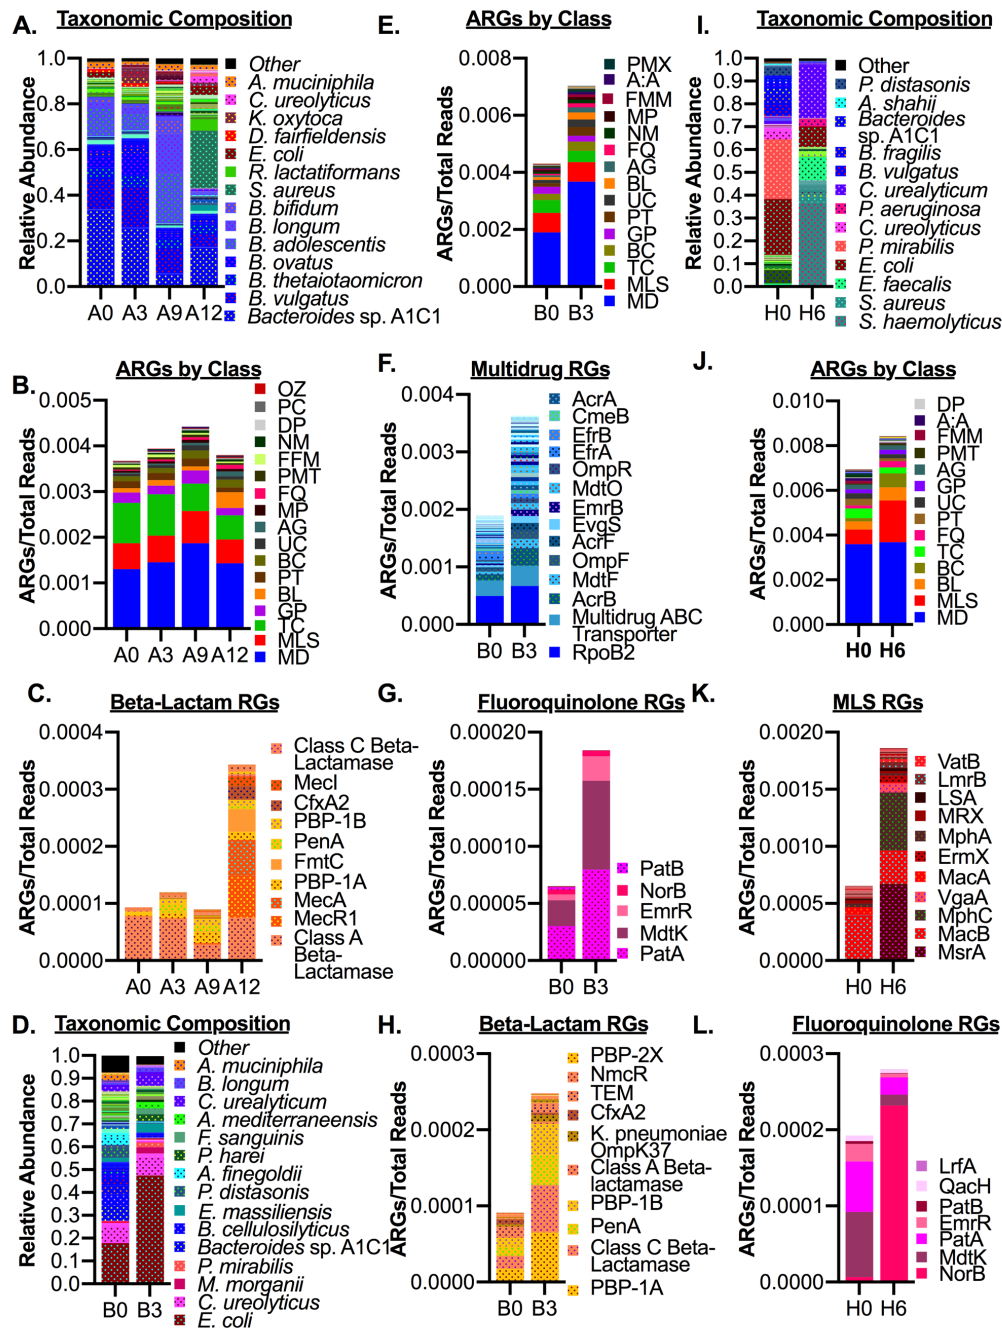

**Figure 3: Antimicrobial Resistance Gene Profiles Reflect Taxonomic Observations**

(A) Relative abundance of species in Subject A, showing a bloom in *S. aureus* at T12. (B) Relative abundance of ARG classes in Subject A, showing an expansion in beta-lactam resistance genes at T12. (C) Relative abundance of beta-lactam resistance genes in Subject A, showing increases in the *mecA/mecI/mecRI* operon at T12. (D) Relative abundance of species in Subject B, showing a bloom in *E. coli* at T3. (E) Relative abundance of ARG classes in Subject B, showing an expansion in multidrug, beta-lactam, and fluoroquinolone resistance genes at T3. (F) Relative abundance of multidrug resistance genes in Subject B, showing increases in various ARGs at T3. (G) Relative abundance of fluoroquinolone resistance genes in Subject B, showing increases in genes including *patA* and *mdtK* at T3. (H) Relative abundance of beta-lactam resistance genes in Subject B, showing increases in genes including penicillin-binding proteins and class C beta-lactamase at T3. (I) Relative abundance of species in Subject H, showing a bloom in *S. haemolyticus* at T6. (J) Relative abundance of ARG classes in Subject H, showing increases in MLS and fluoroquinolone resistance genes. (K) Relative abundance of MLS resistance genes in Subject H, showing an increase in staphylococcal resistance gene *msrA* and others at T6. (L) Relative abundance of fluoroquinolone resistance genes in Subject H, showing an increase in staphylococcal resistance gene *norB* and others at T6.



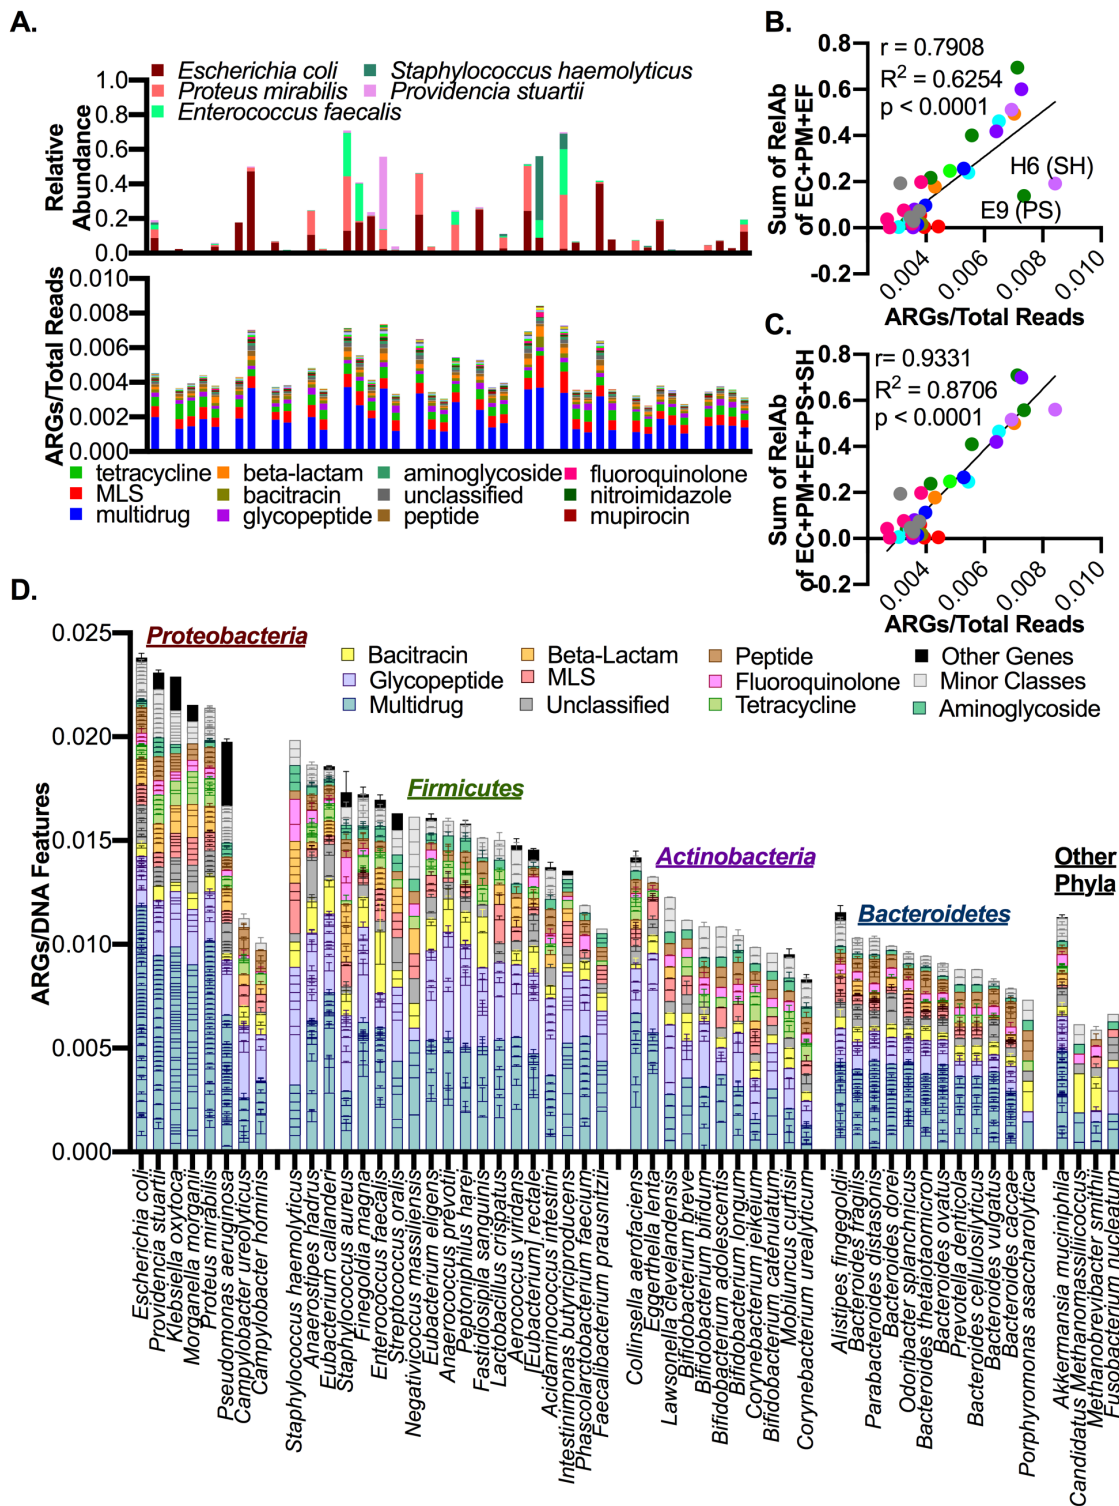

Figure 4: Relationship of ARG Levels to the Relative Abundance of Specific Pathobionts

(A) Correspondence between the relative abundances of key species of interest (*E. coli*, *P. mirabilis*, *E. faecalis*, *P. stuartii*, and *S. haemolyticus*) and total ARG density in each sample. (B) Correlation between the sum of the relative abundances of *E. coli*, *P. mirabilis*, and *E. faecalis* and the total ARG density in each sample ( $r = 0.791$ ,  $R^2 = 0.6254$ ,  $p < 0.0001$ ; Pearson's correlation). (C) Correlation between the sum of the relative abundances of *E. coli*, *P. mirabilis*, *E. faecalis*, *P. stuartii*, and *S. haemolyticus* and the total ARG density in each sample ( $r = 0.933$ ,  $R^2 = 0.8706$ ,  $p < 0.0001$ ; Pearson's correlation). (D) Average ARG density in bins of species across all samples in which we were able to construct a bin for that species. Specific genes are grouped and colored by their ARG class, and bins are grouped by phylum and ranked by their total average ARG density within that phylum.

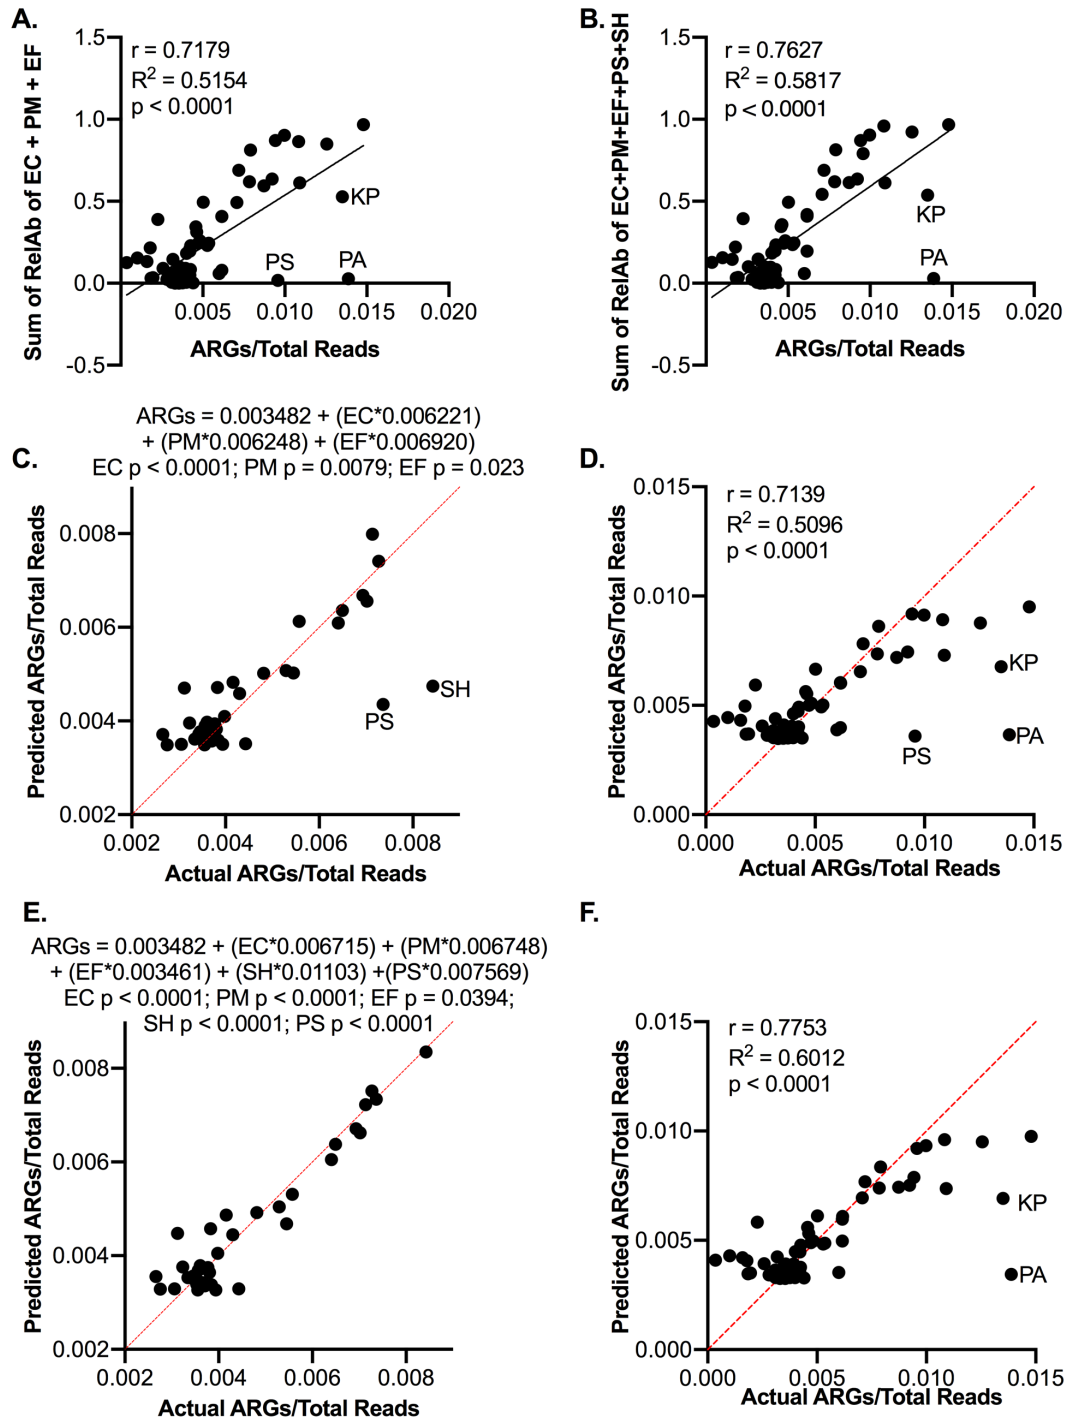

**Figure 5: Prediction of ARG Density From Relative Abundance of Specific Pathobionts**

(A) Correlation between the sum of the relative abundances of *E. coli*, *P. mirabilis*, and *E. faecalis* and the total ARG density in each sample in the test dataset ( $r = 0.7139$ ,  $r^2 = 0.5096$ ,  $p < 0.0001$ ; Pearson's correlation). (B) Correlation between the sum of the relative abundances of *E. coli*, *P. mirabilis*, *E. faecalis*, *P. stuartii*, and *S. haemolyticus* and the total ARG density in each sample in the test dataset ( $r = 0.7753$ ,  $r^2 = 0.6012$ ,  $p < 0.0001$ ; Pearson's correlation). (C) Multiple linear regression of relative abundances of *E. coli*, *P. mirabilis*, and *E. faecalis* to ARG density in samples in the levofloxacin dataset (38 samples). (D) Correlation between the predicted ARG density and actual ARG density in the test dataset (67 samples) based on the relative abundances of *E. coli*, *P. mirabilis*, and *E. faecalis*. (E) Multiple linear regression of relative abundances of *E. coli*, *P. mirabilis*, *E. faecalis*, *P. stuartii*, and *S. haemolyticus* to ARG density in samples in the levofloxacin dataset (38 samples). (F) Correlation between the predicted ARG density and actual ARG density in the test dataset (67 samples) based on the relative abundances of *E. coli*, *P. mirabilis*, *E. faecalis*, *P. stuartii*, and *S. haemolyticus*.
